# Supplementary material for: Design, synthesis and biological evaluation of 1H-pyrrolo[2,3-b]pyridine derivatives as potent fibroblast growth factor receptor inhibitors
Source: Royal Society of Chemistry journal article supplement (doi:10.1039/d1ra02660g), 2021-01-01

## Supporting information

### Design, Synthesis and Biological Evaluation 1*H*-pyrrolo[2,3-*b*] pyridine Derivatives as Potent Fibroblast Growth Factor Receptor Inhibitors

Xingping Su <sup>a,†</sup>, Zhihao Liu <sup>a,†</sup>, Lin Yue <sup>a</sup>, Xiuli Wu <sup>a</sup>, Wei Wei <sup>a</sup>, Hanyun Que <sup>a</sup>,  
Tinghong Ye <sup>a</sup>, Yi Luo <sup>b,\*</sup>, Yiwen Zhang <sup>a,\*</sup>

<sup>a</sup> *Sichuan University-University of Oxford Huaxi Joint Centre for Gastrointestinal Cancer, State Key Laboratory of Biotherapy, West China Hospital, Sichuan University, Chengdu, Sichuan, 610041, China.*

<sup>b</sup> *Department of Orthopedics, West China Hospital of Sichuan University, wai nan guo xue xiang 37#, 610041, Chengdu, Sichuan, China.*

**Supporting chemistry Information:**

**3a:**

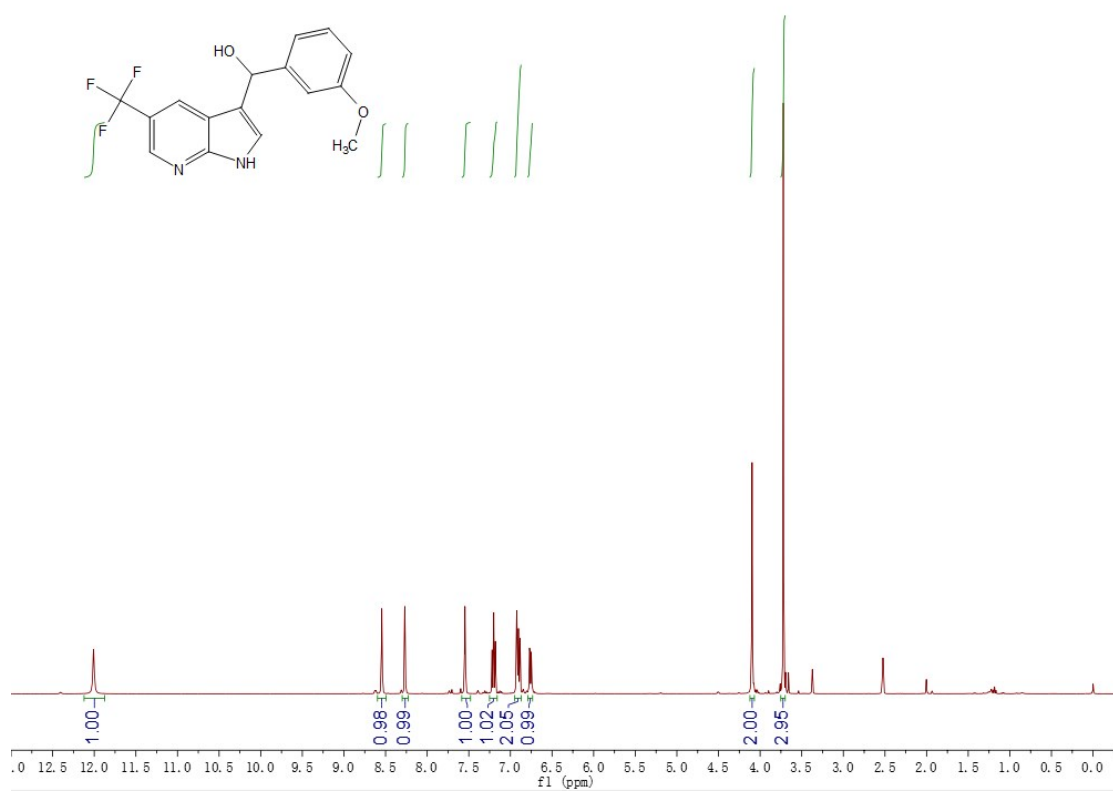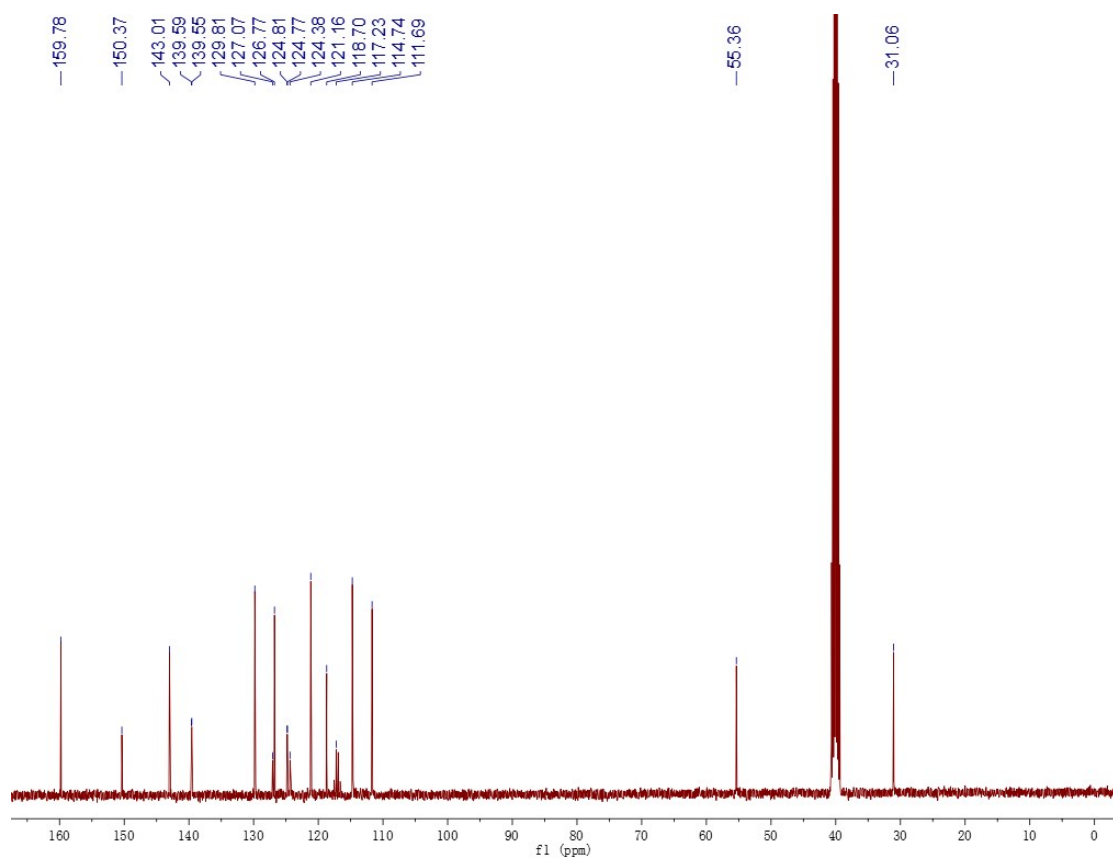

13:49:46  
190613\_YLT\_SXP\_02 18 (0.308) Cm (4:24)

13-Jun-2019  
TOF MS ES+  
1.13e4

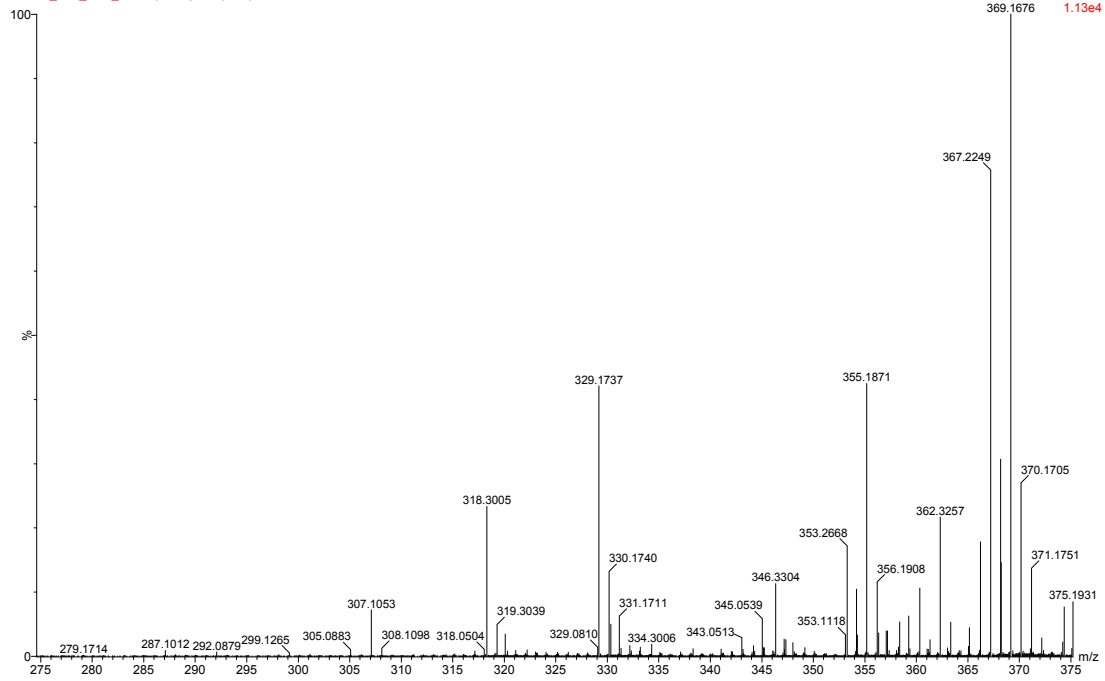

3b

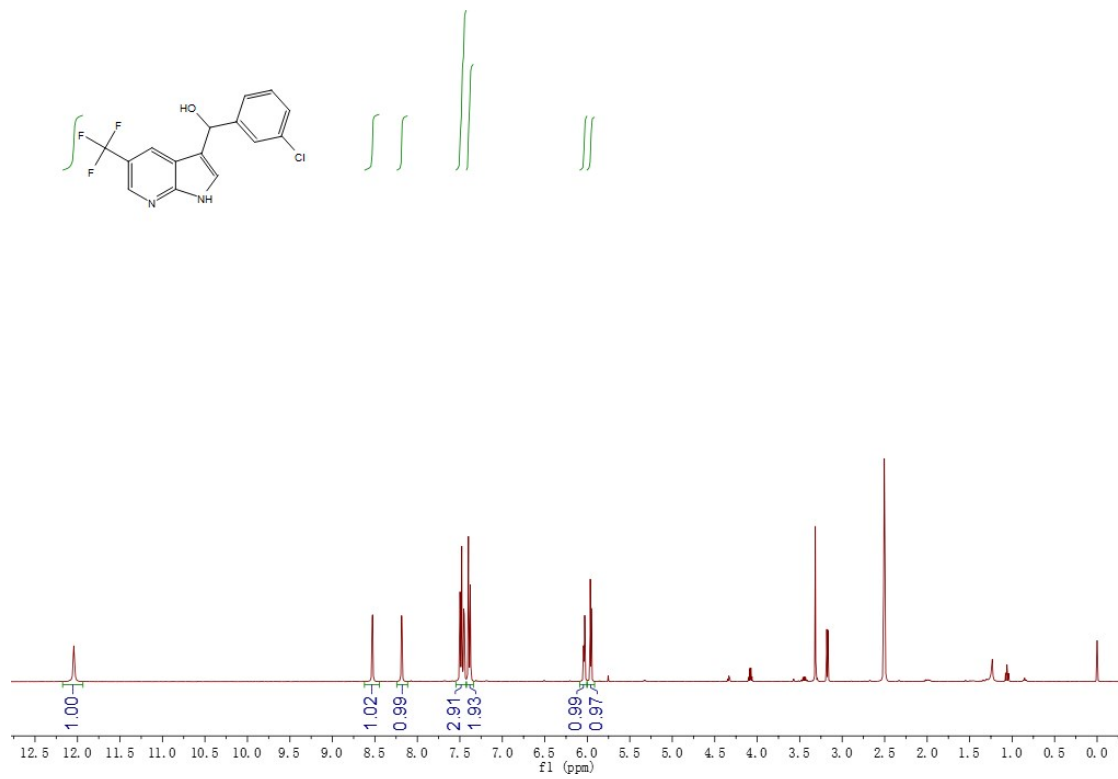

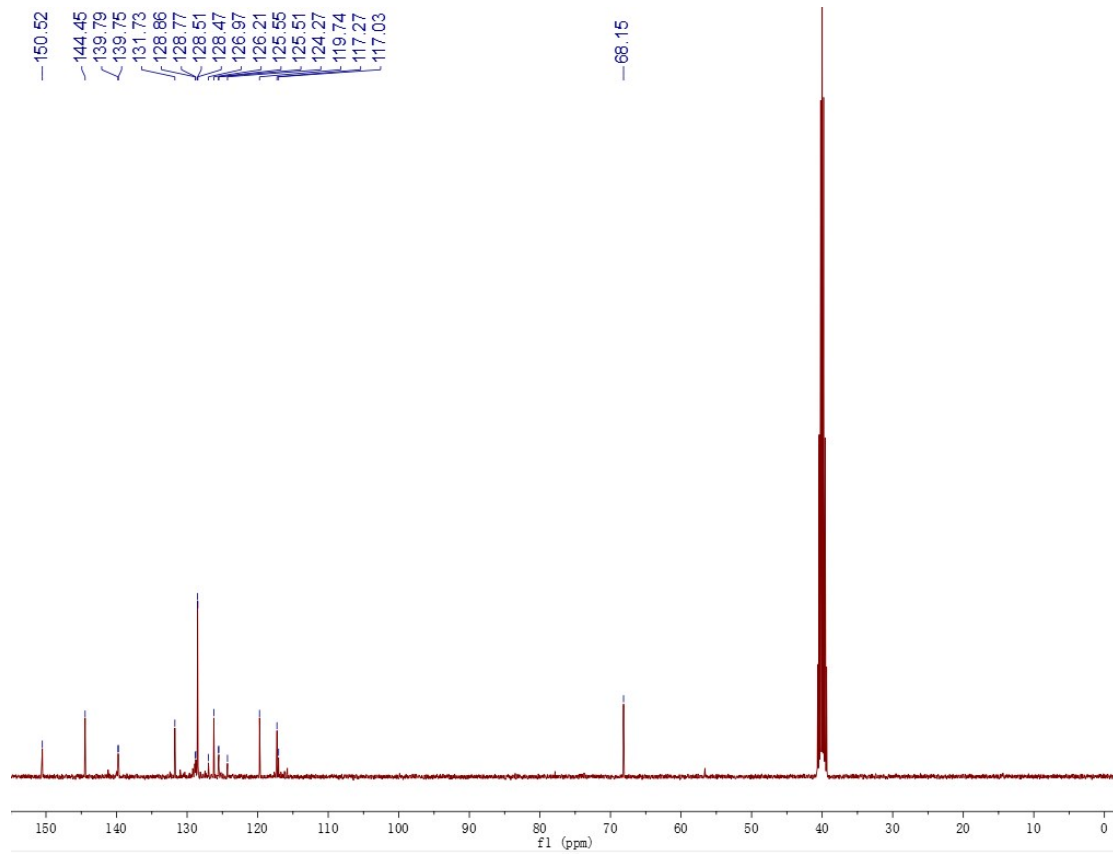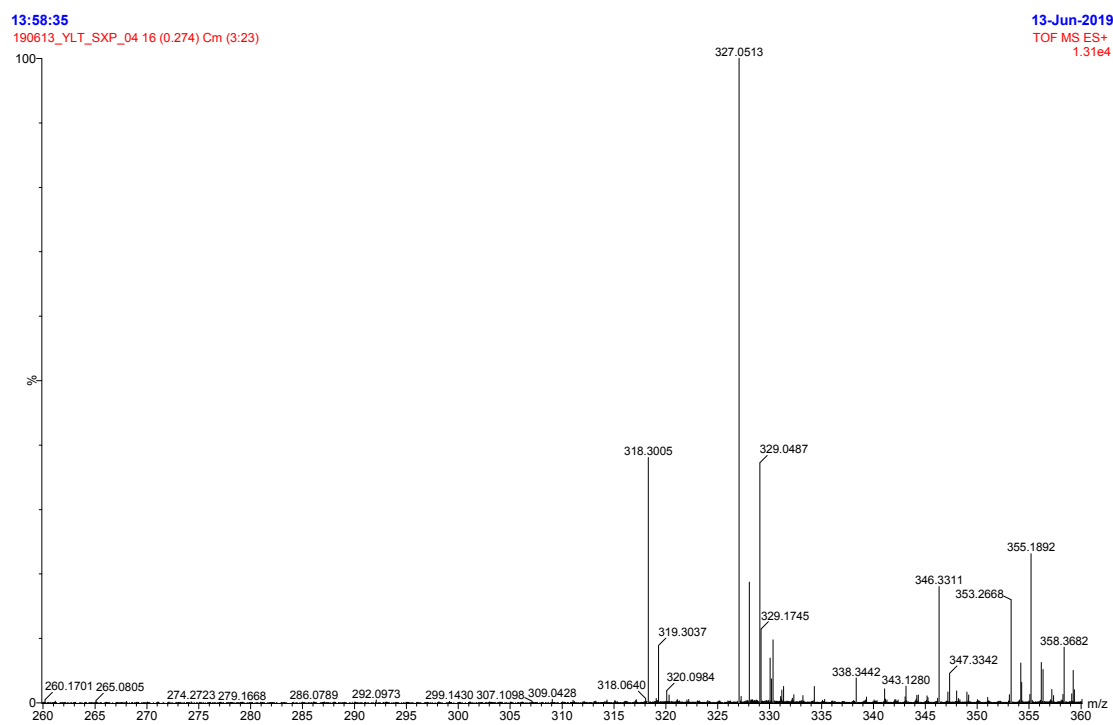

3c

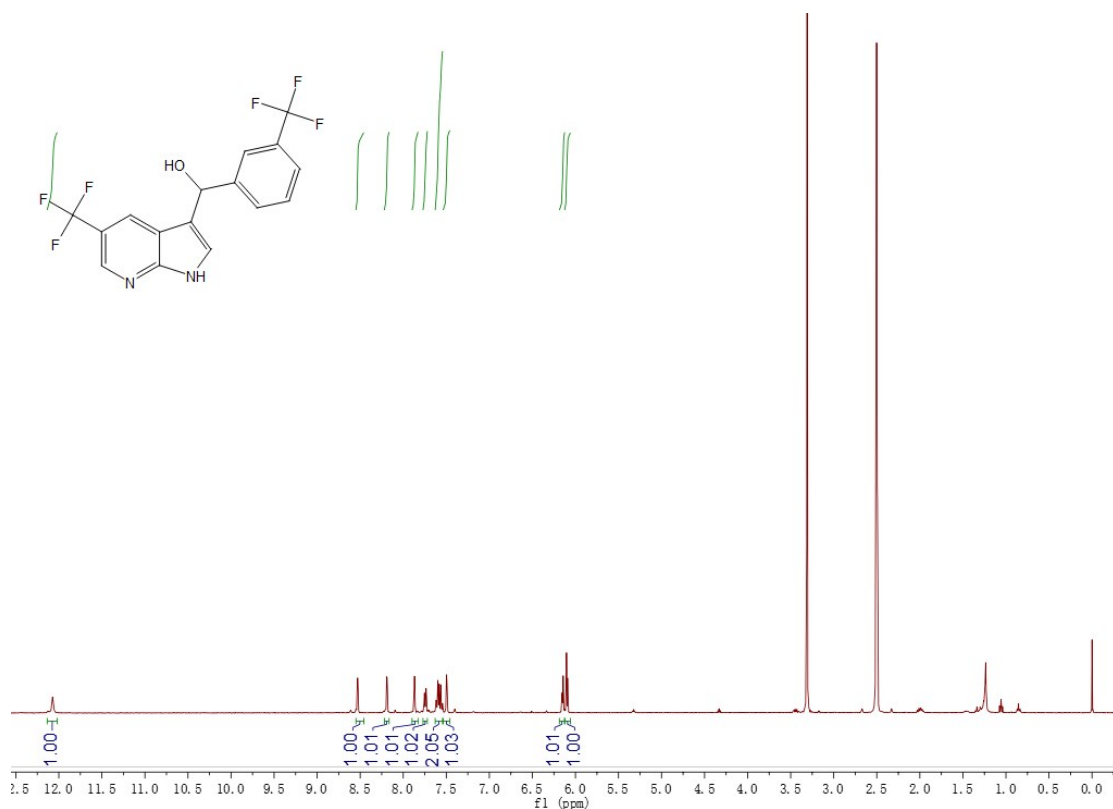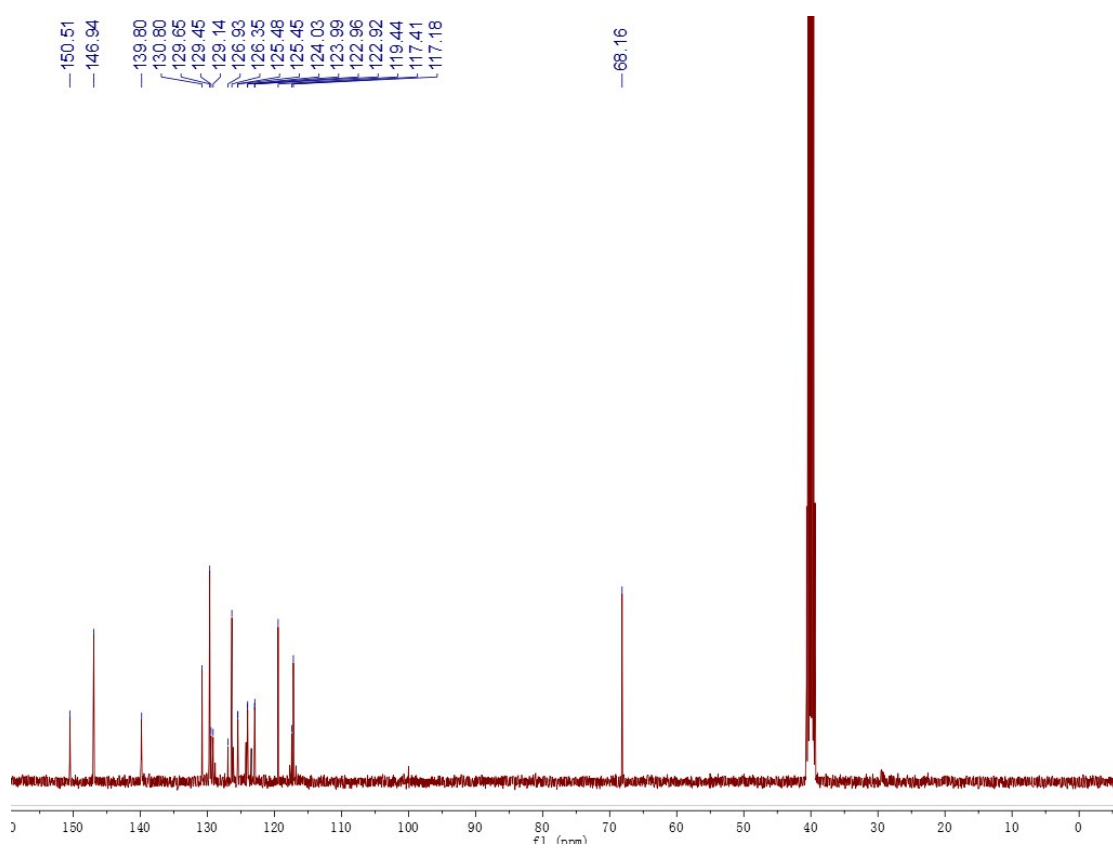

09:53:59  
190627\_YLT\_SXP\_S29 3 (0.051) Cm (2:24)

27-Jun-2019  
TOF MS ES+  
6.74e4

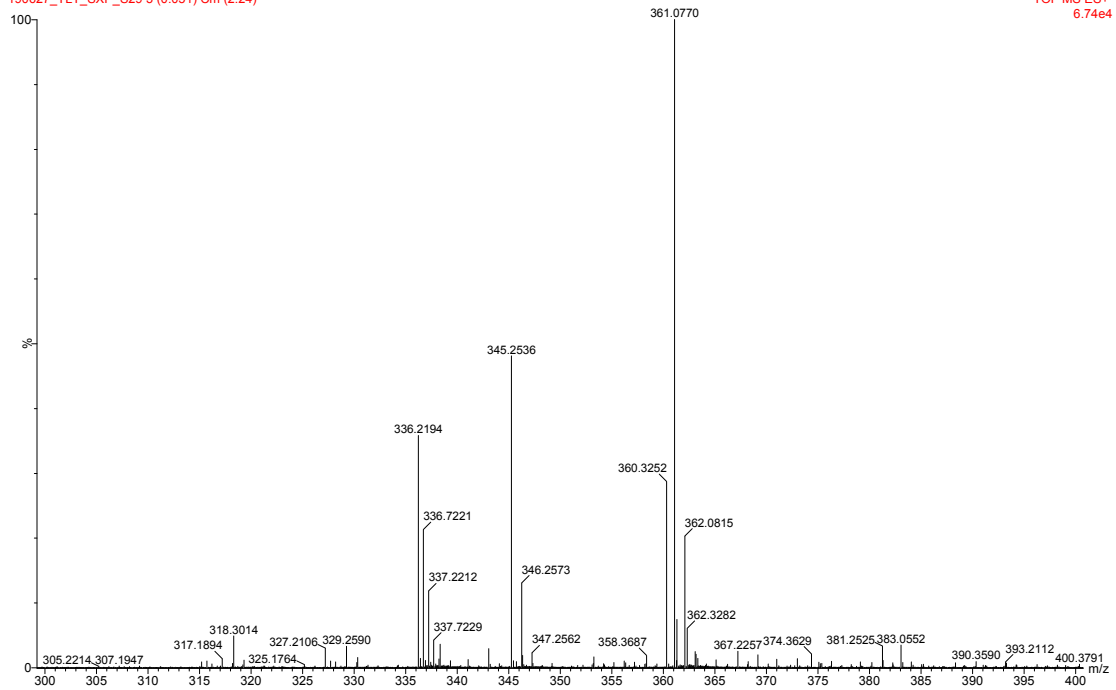

3d

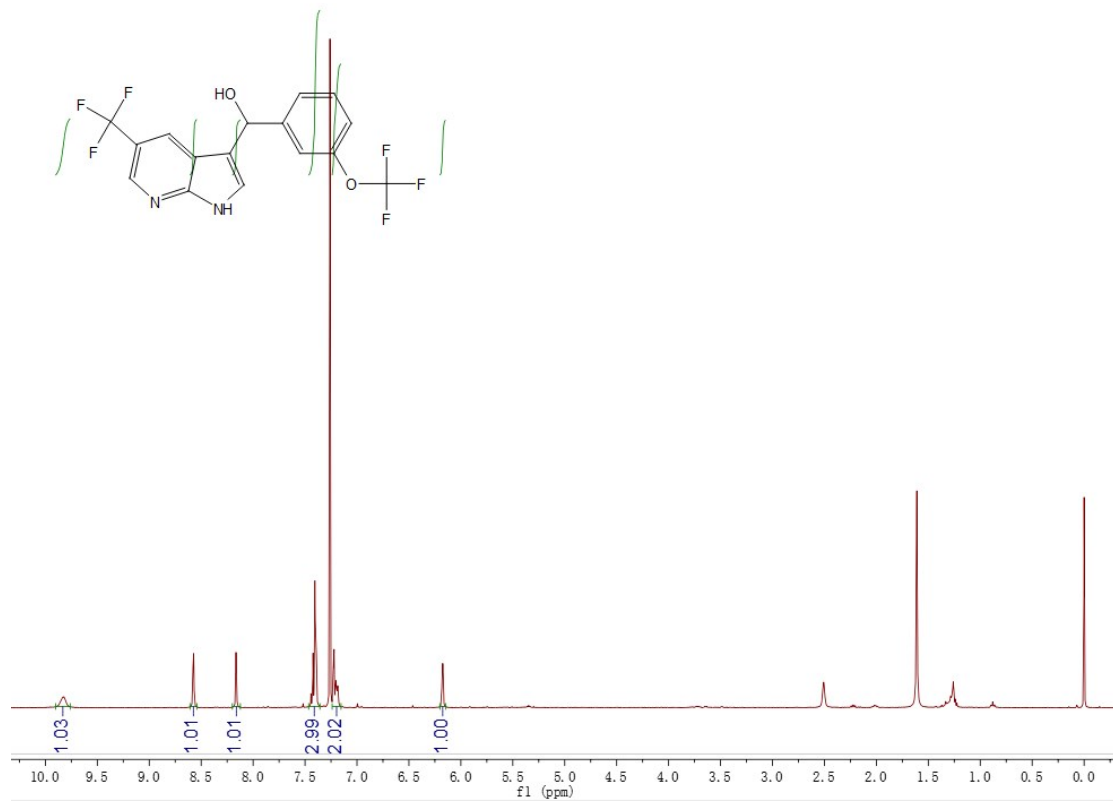

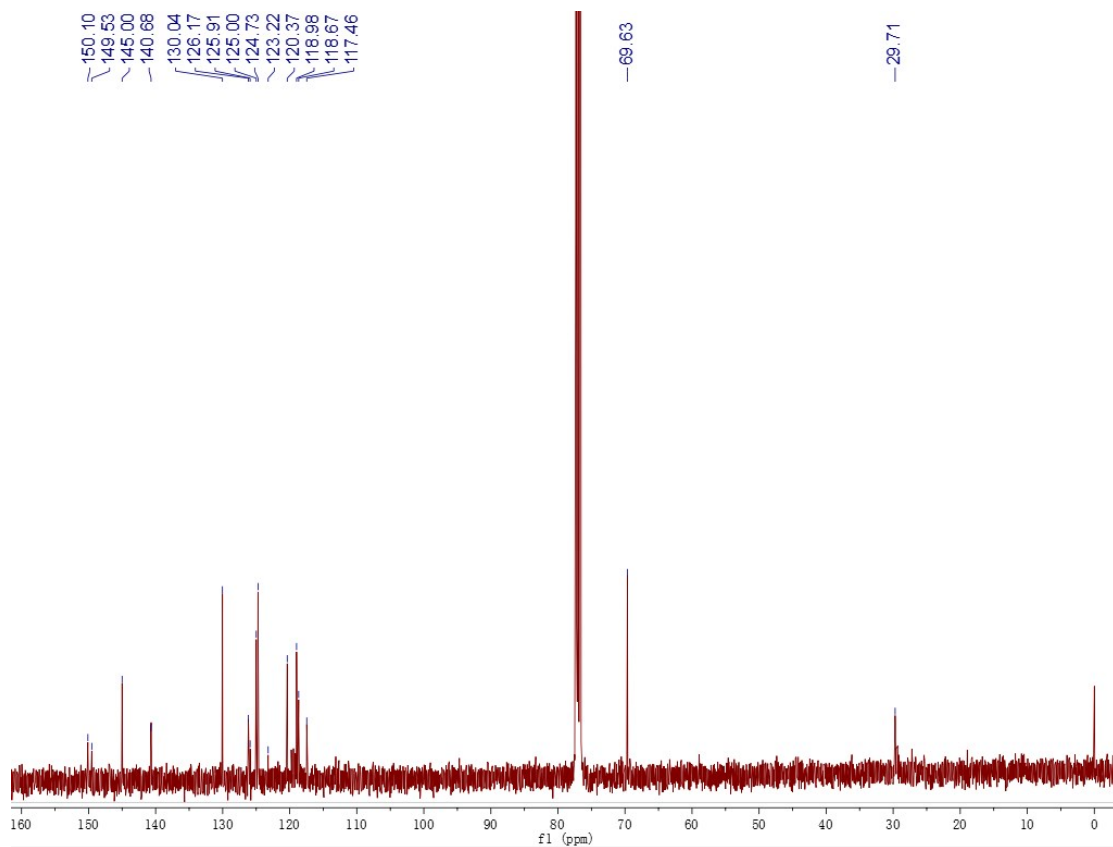

14:05:10  
190613\_YLT\_SXP\_07 7 (0.120) Cm (1:24)

13-Jun-2019  
TOF MS ES+  
5.62e3

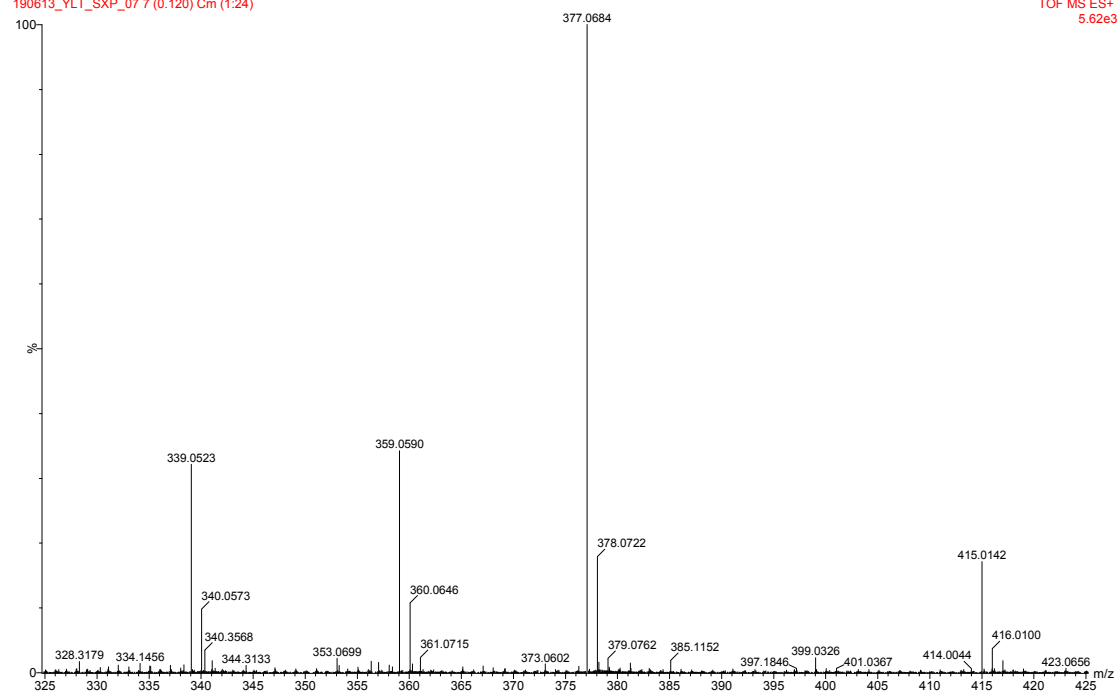

3e

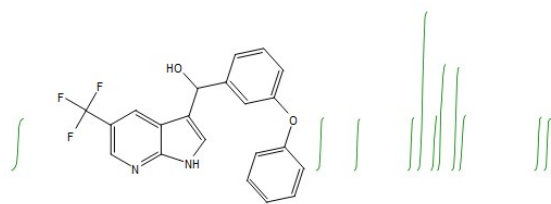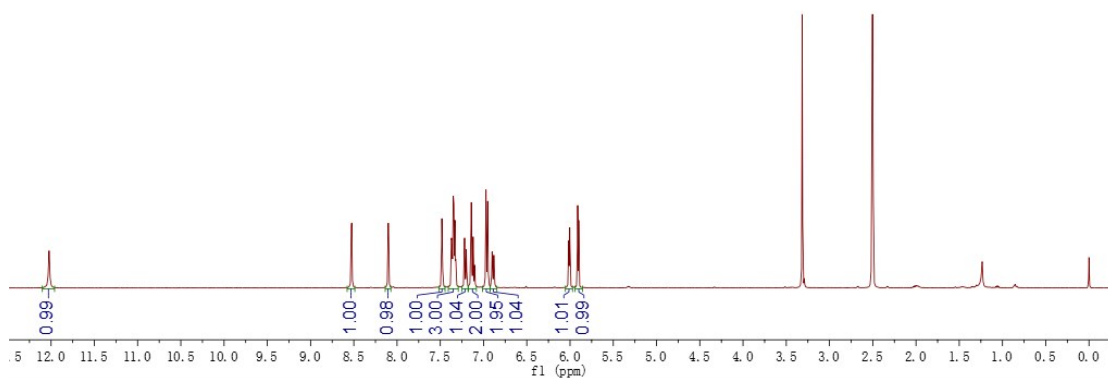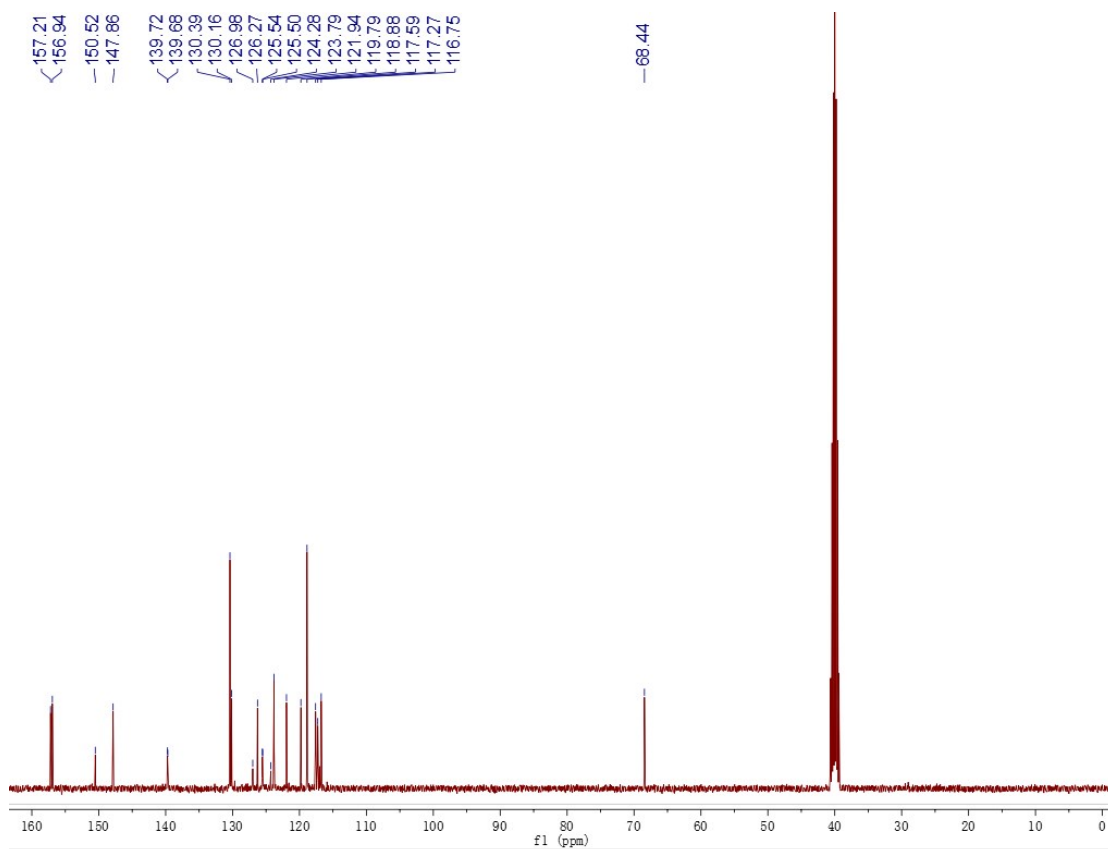



14:00:47  
190613\_YLT\_SXP\_05 11 (0.188) Cm (1:24)

13-Jun-2019  
TOF MS ES+  
6.52e3

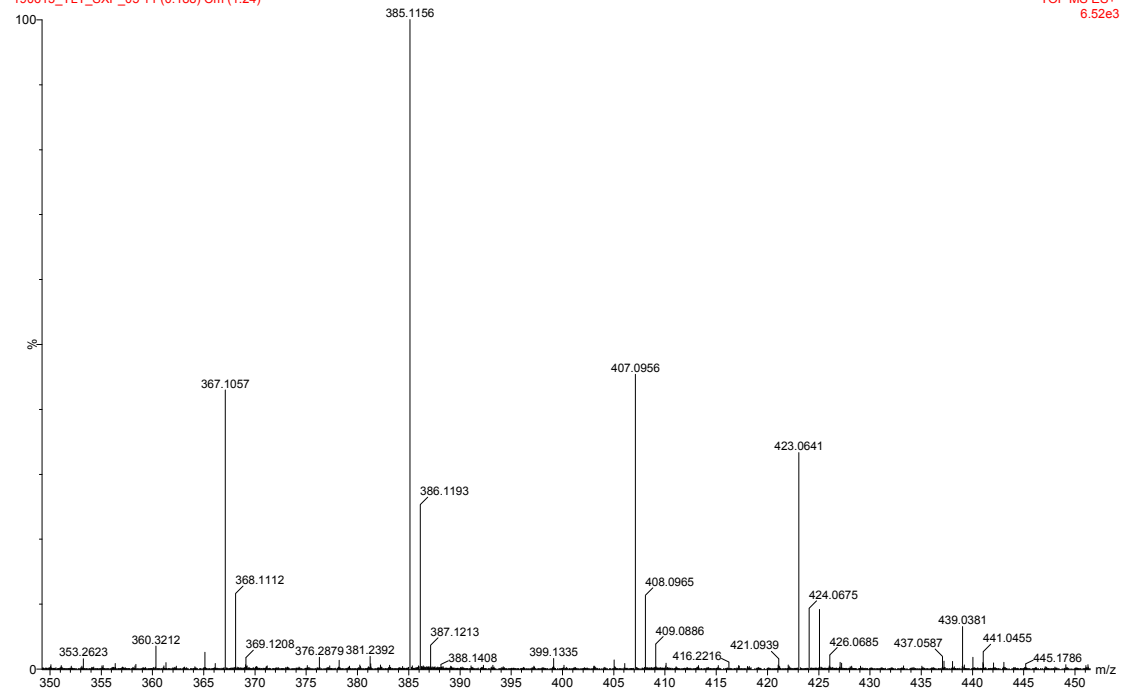

3f

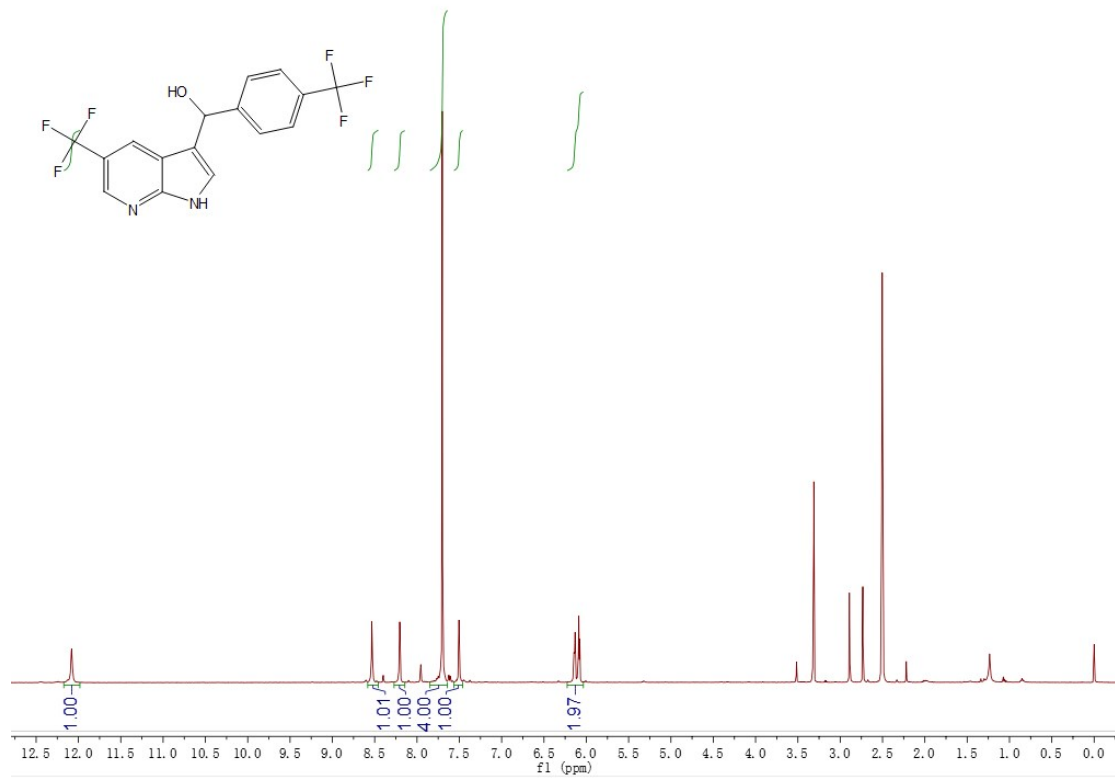

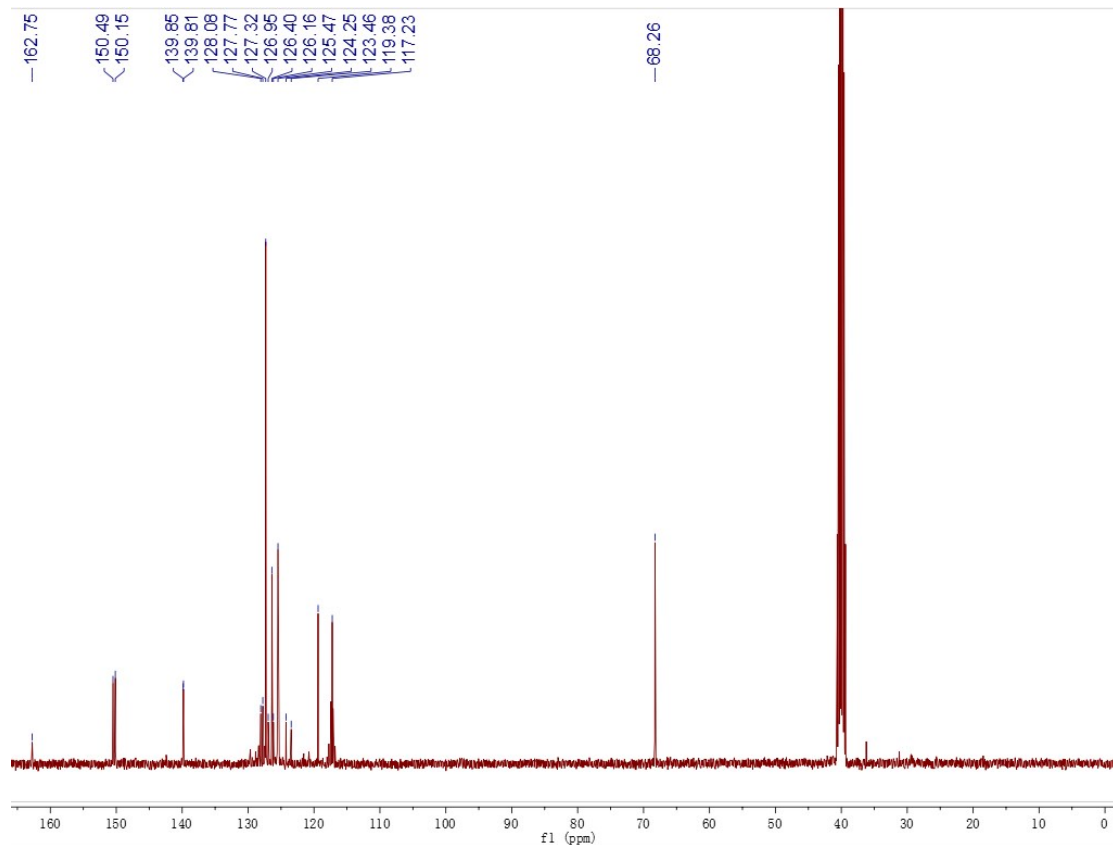

09:51:59  
190627\_YLT\_SXP\_S28 6 (0.103) Cm (4:24)

27-Jun-2019  
TOF MS ES+  
3.66e4

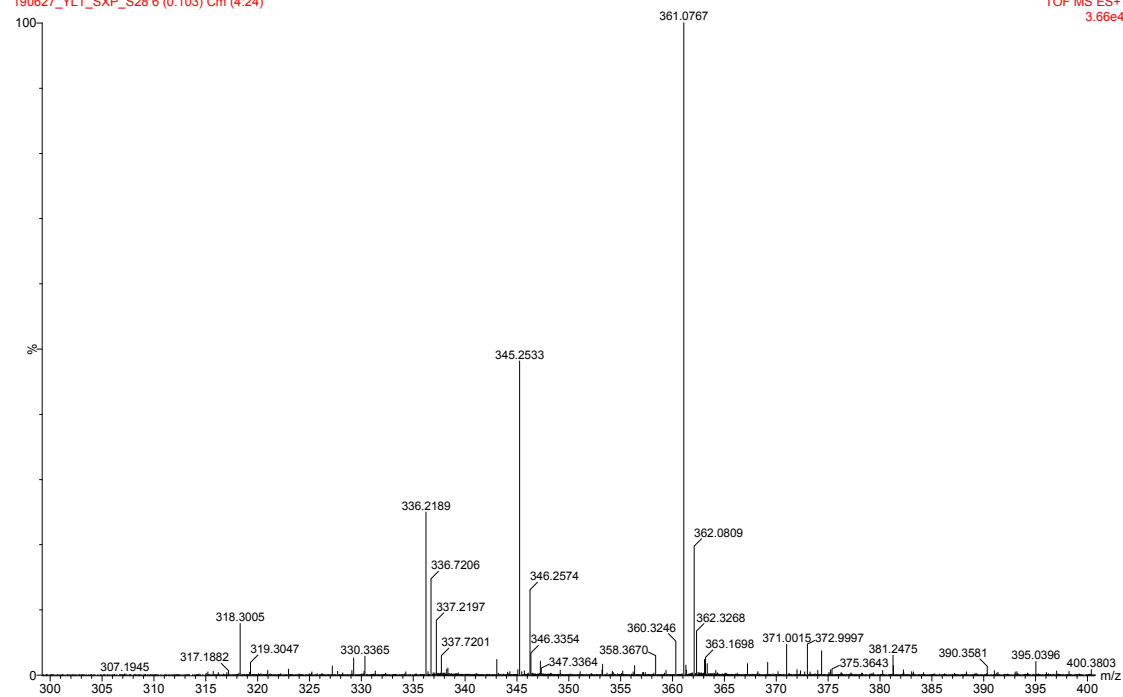

3g

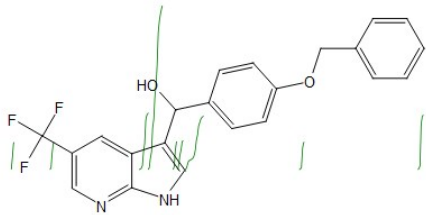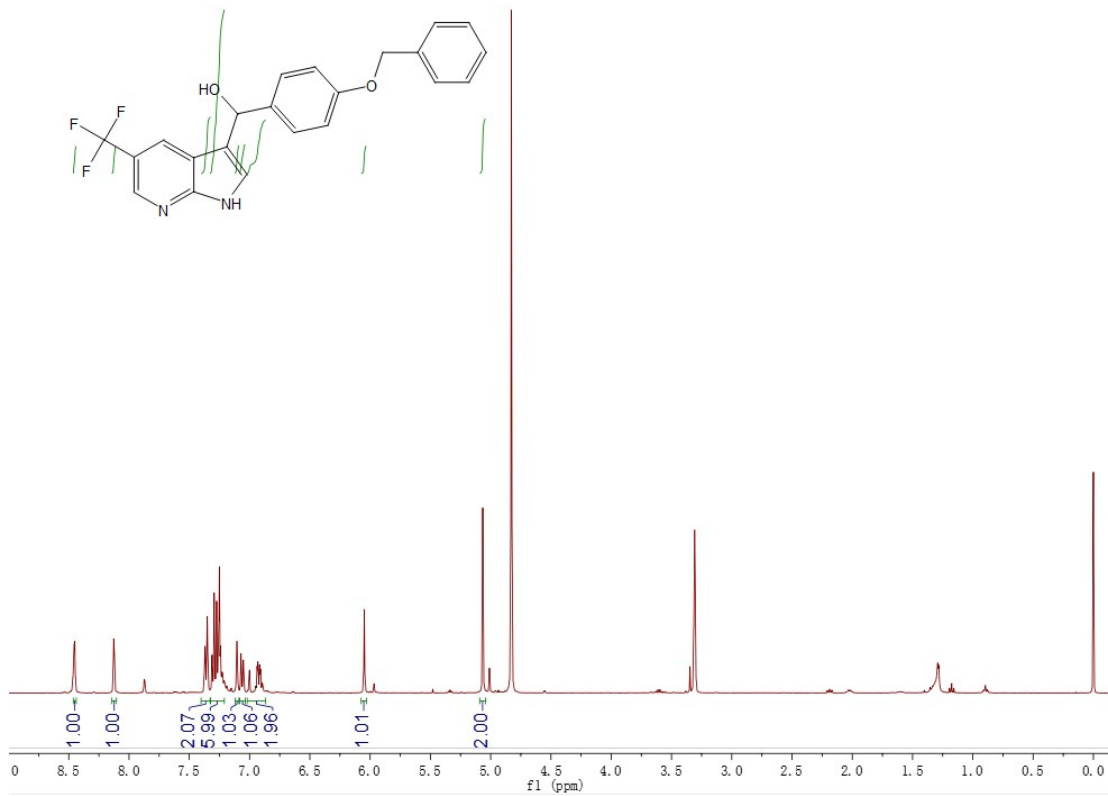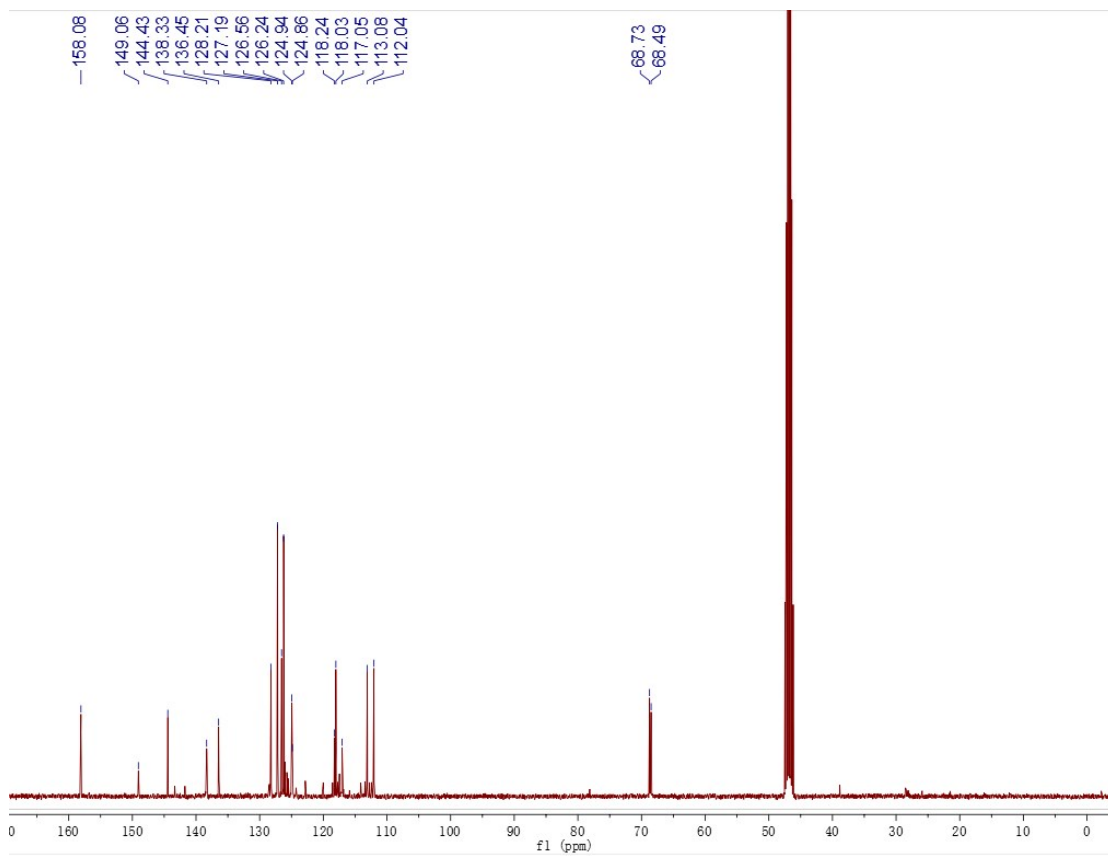

13:55:21  
190613\_YLT\_SXP\_03 13 (0.222) Cm (1:24)

13-Jun-2019  
TOF MS ES+  
6.44e4

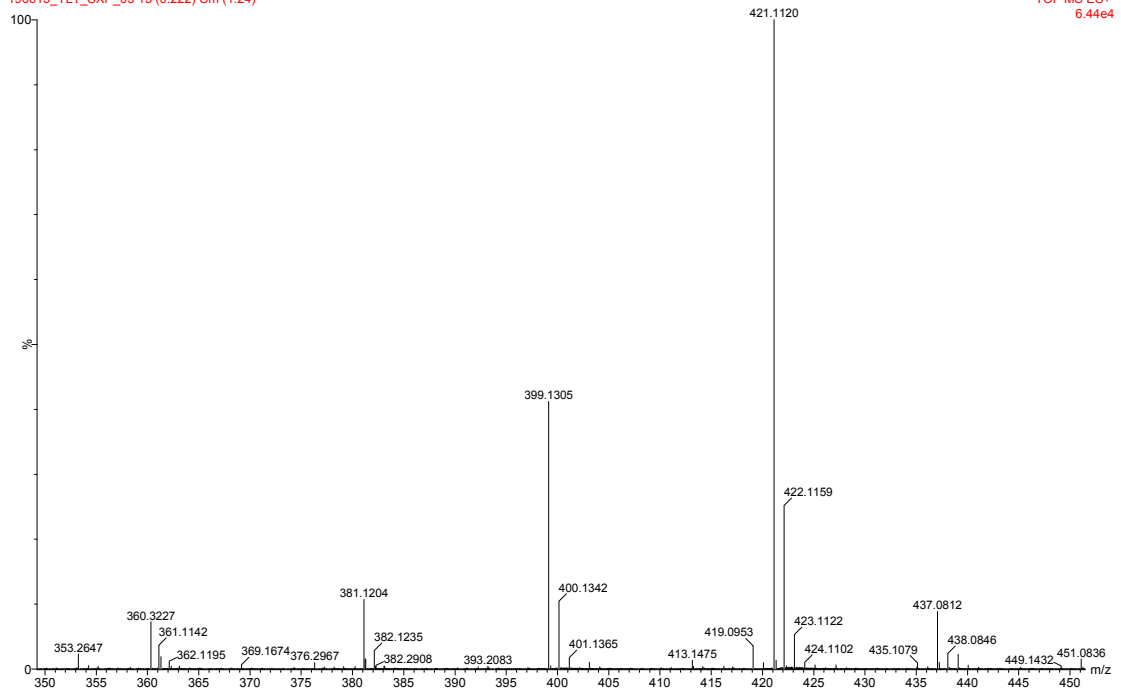

3h

13:44:59  
190613\_YLT\_SXP\_01 22 (0.376) Cm (3:24)

13-Jun-2019  
TOF MS ES+  
3.07e4

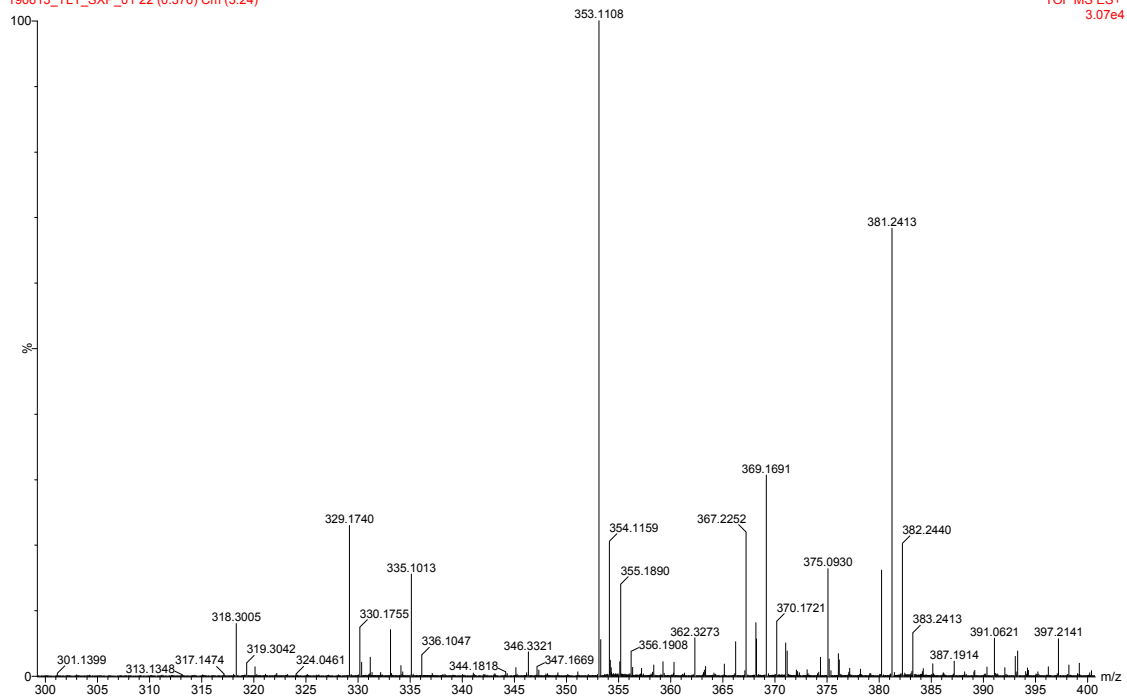

3i

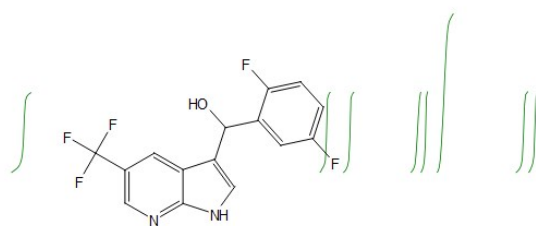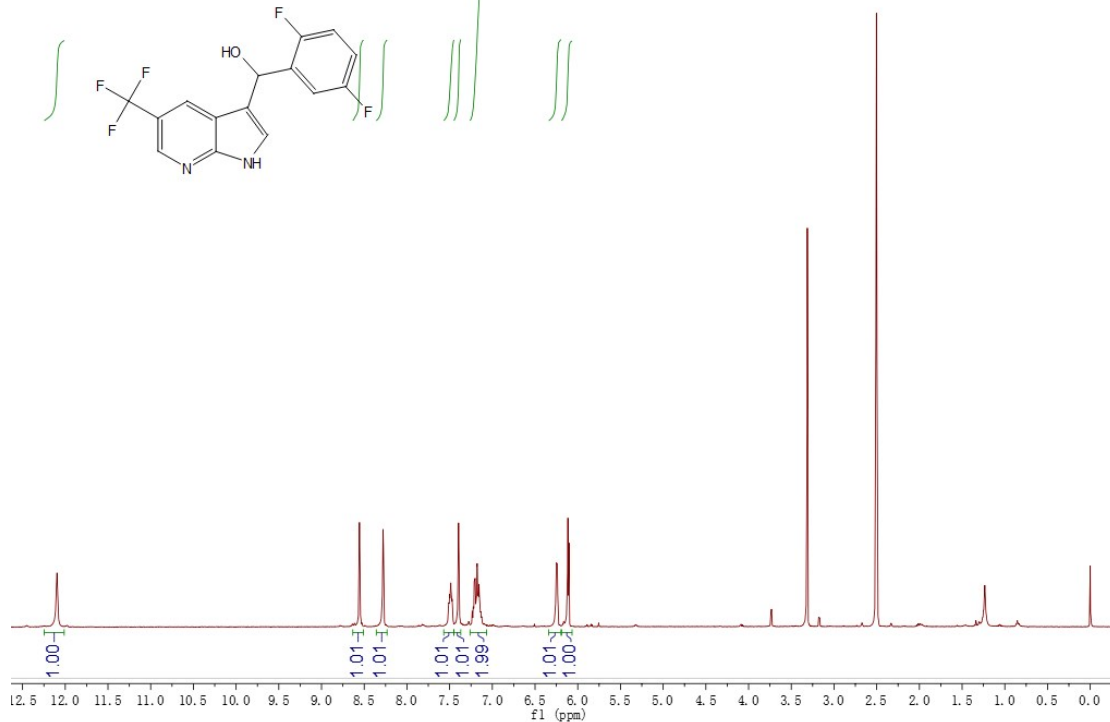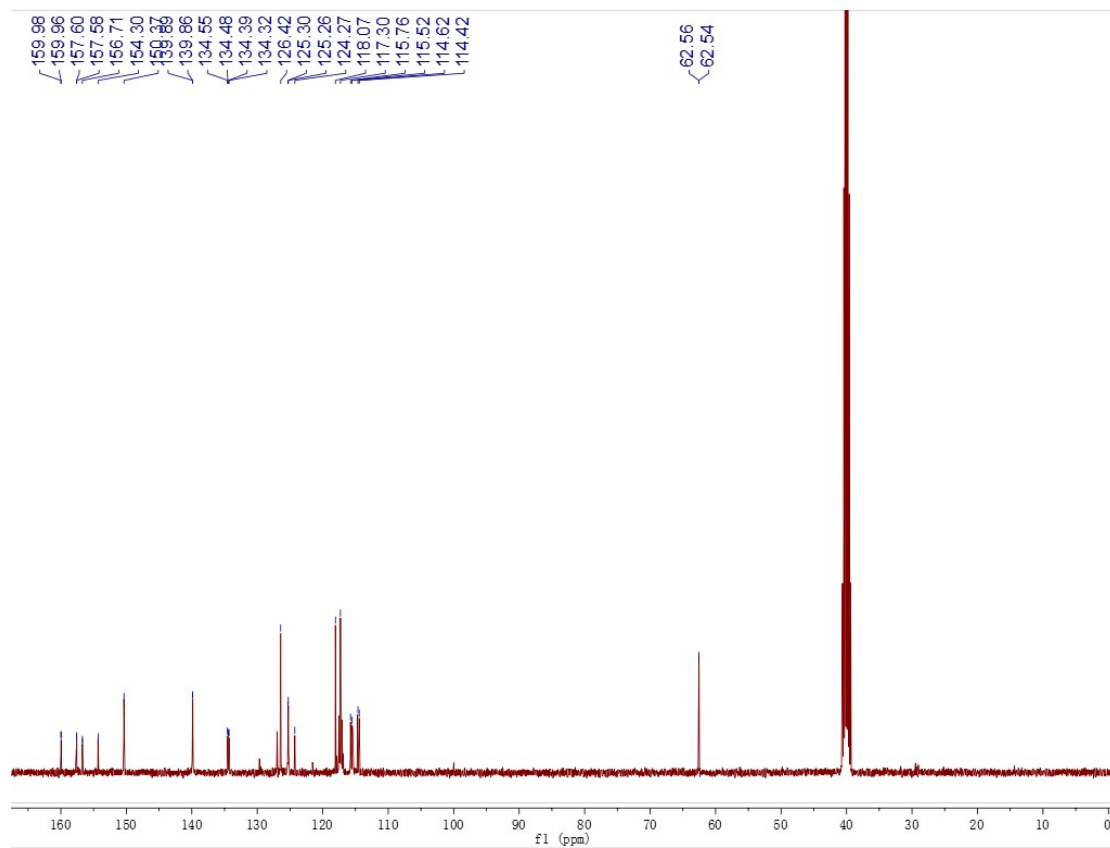

09:46:15  
190627\_YLT\_SXP\_S26 14 (0.239) Cm (1:23)

27-Jun-2019  
TOF MS ES+  
1.45e4

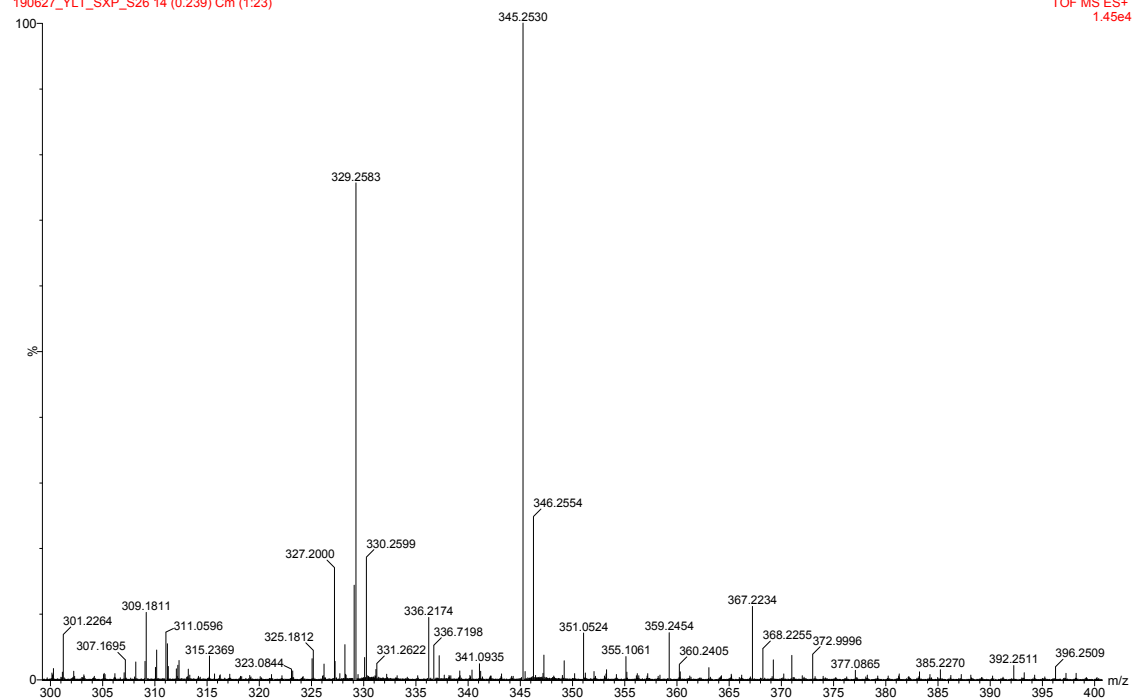

3j

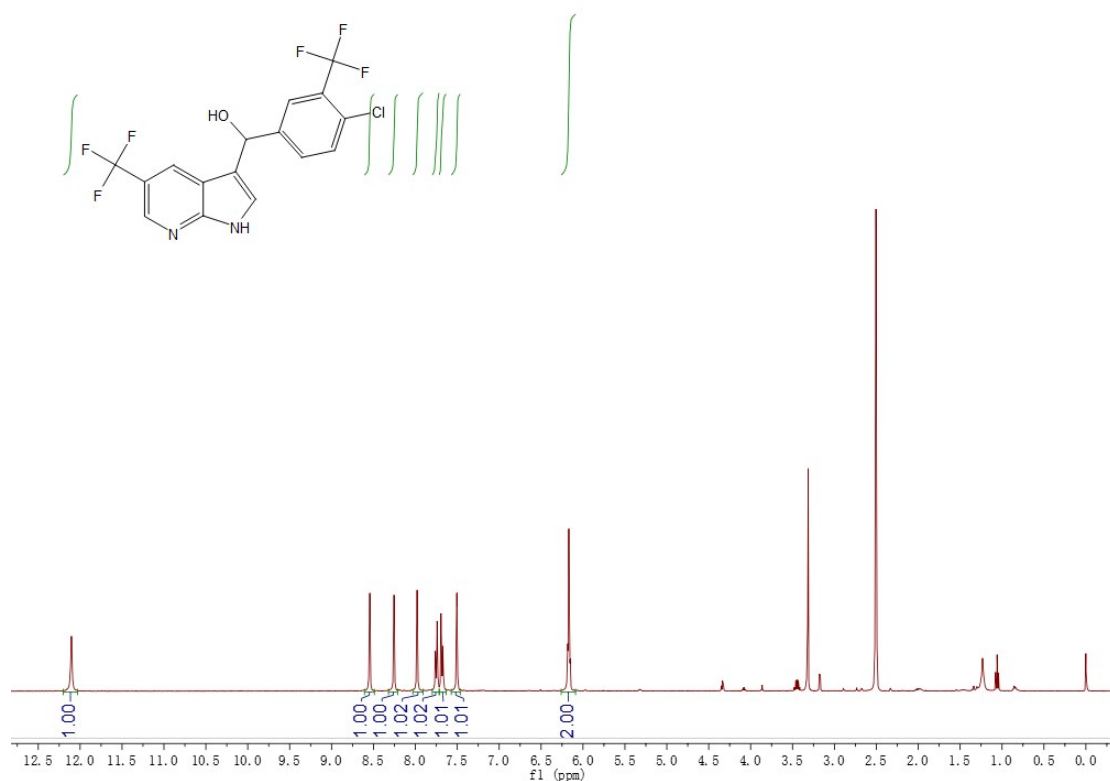

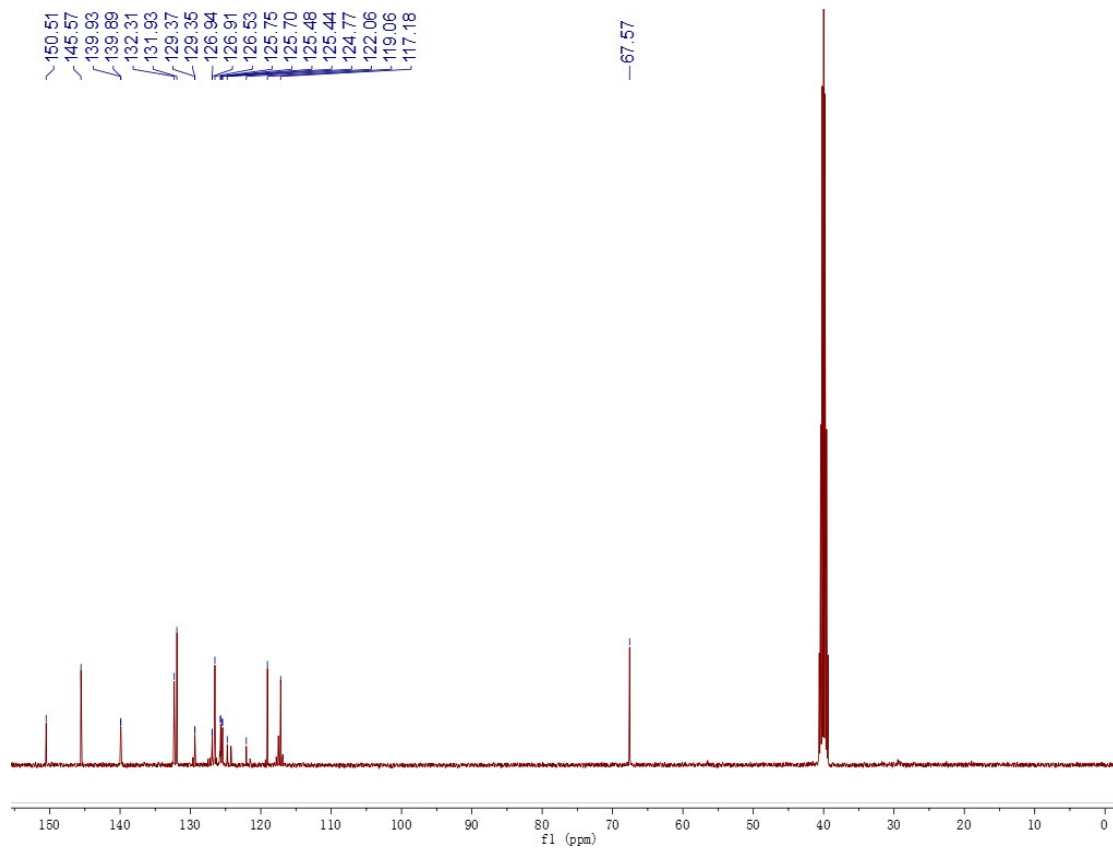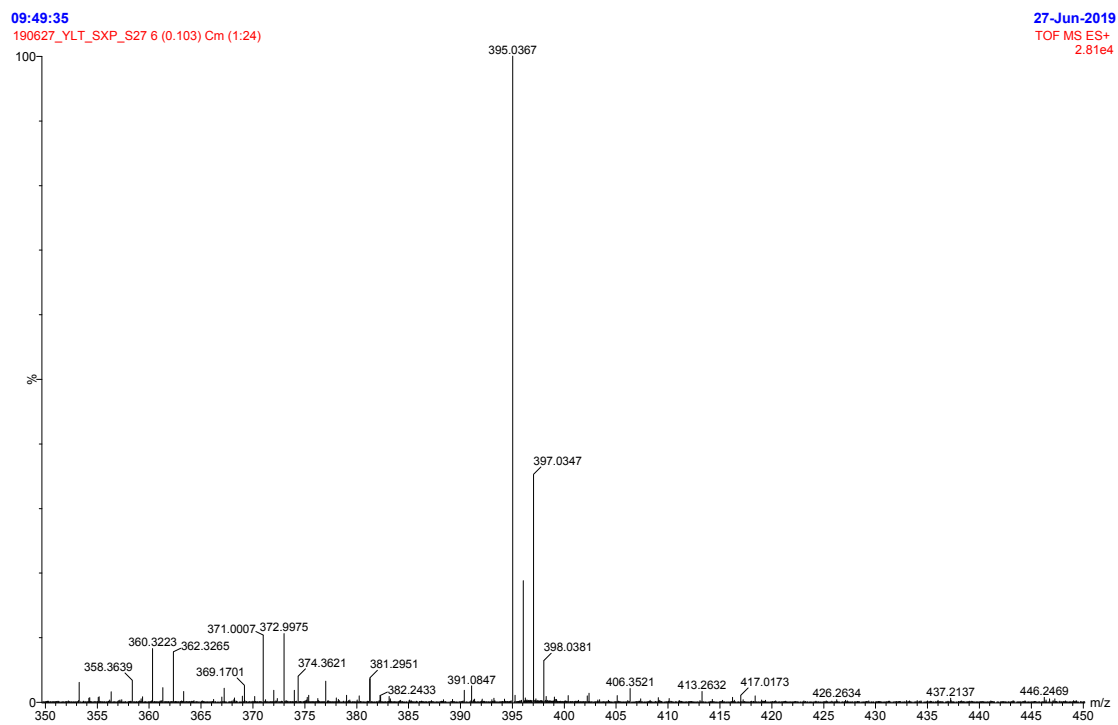

3k

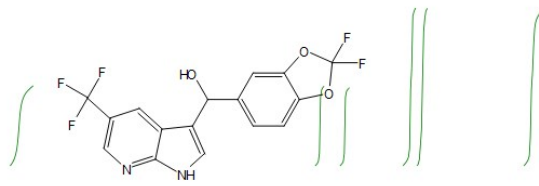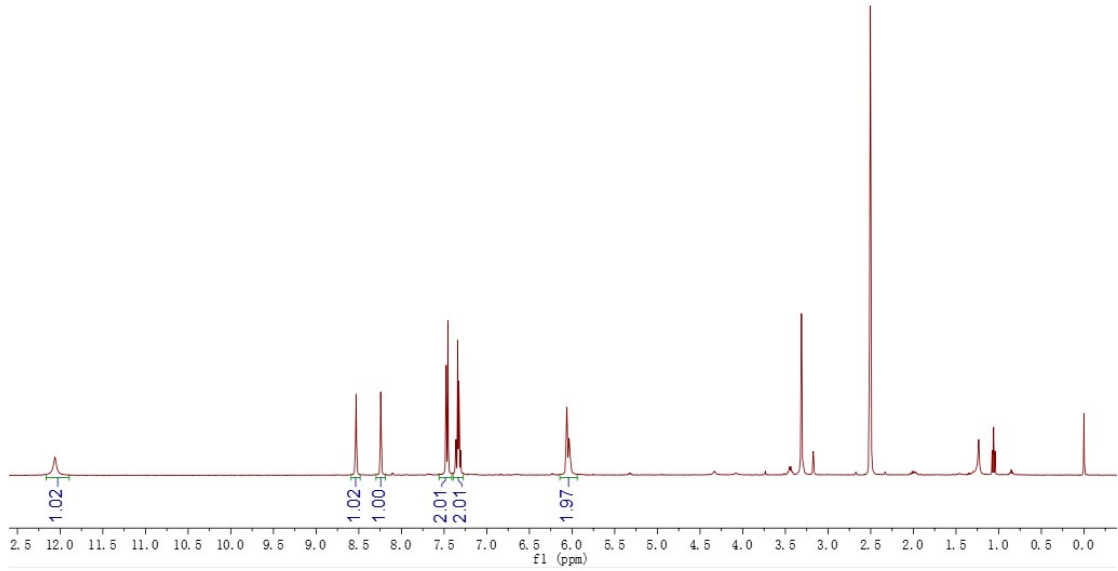

150.14  
 144.08  
 143.37  
 140.46  
 139.05  
 131.67  
 129.13  
 126.24  
 126.21  
 125.06  
 123.22  
 121.63  
 118.75  
 117.58  
 109.29  
 108.00

69.88

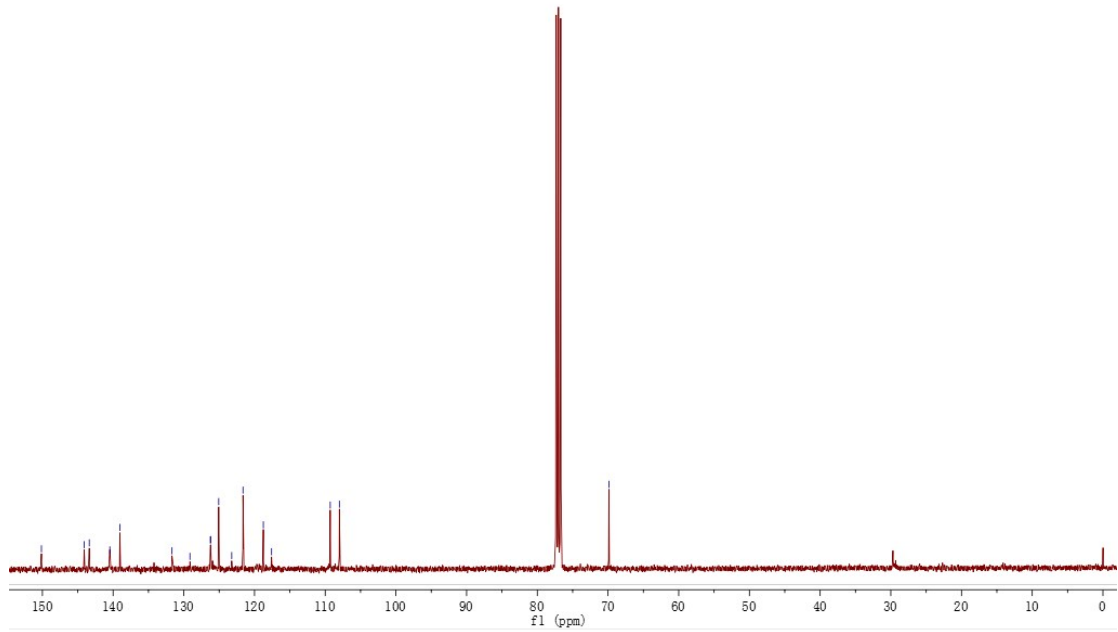



14:02:59  
190613\_YLT\_SXP\_06 22 (0.376) Cm (1:24)

13-Jun-2019  
TOF MS ES+  
3.50e3

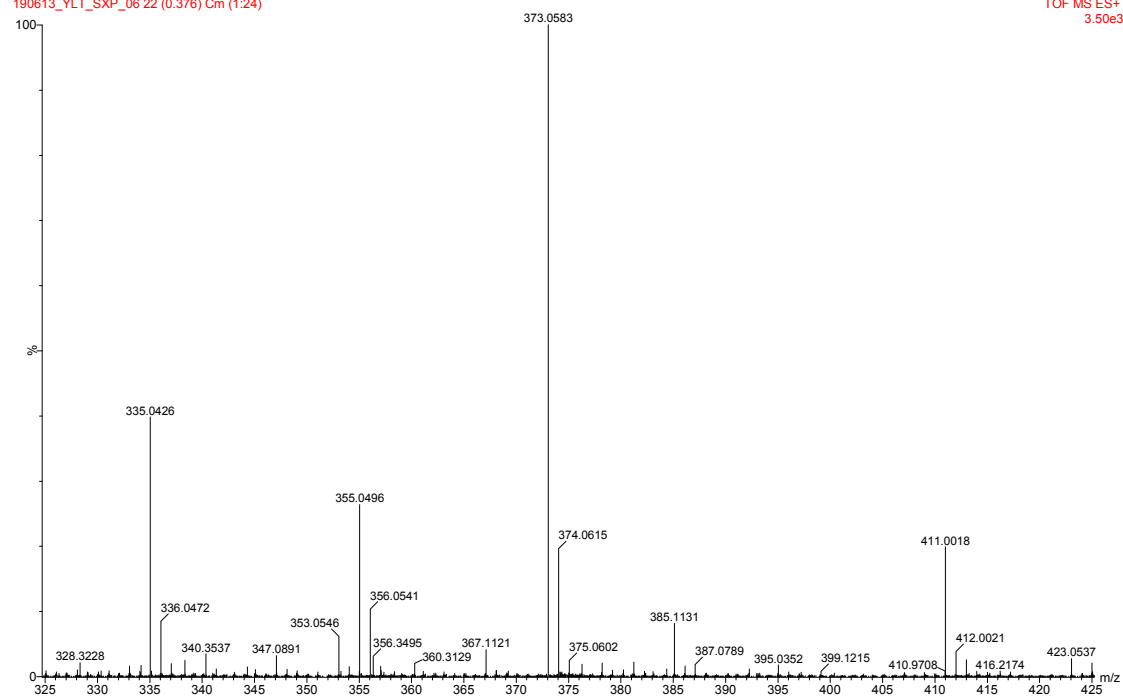

4a

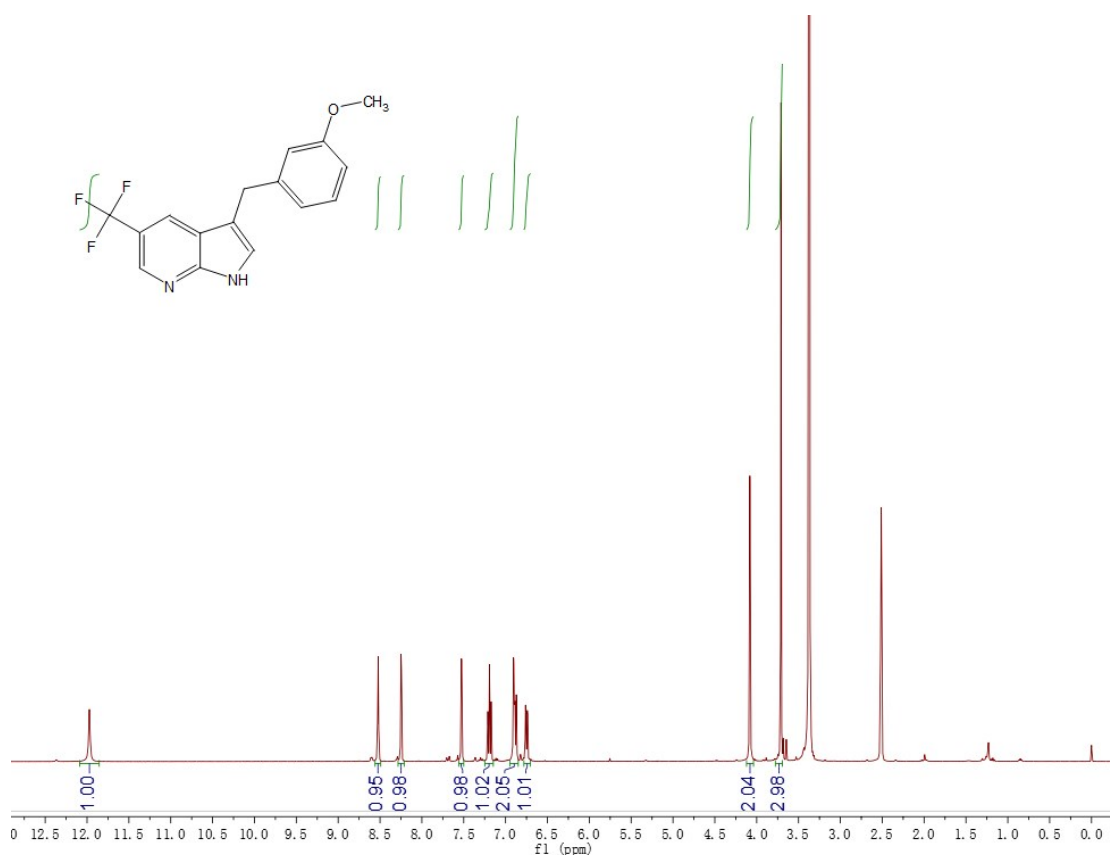

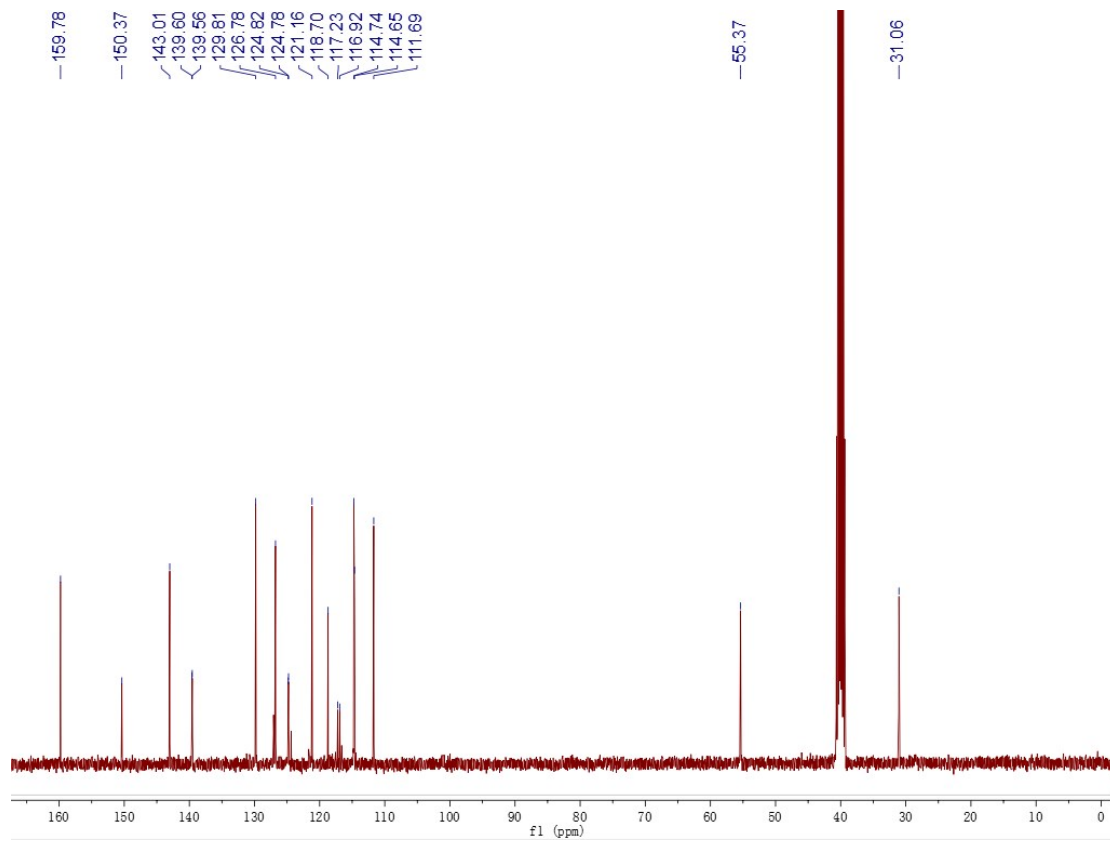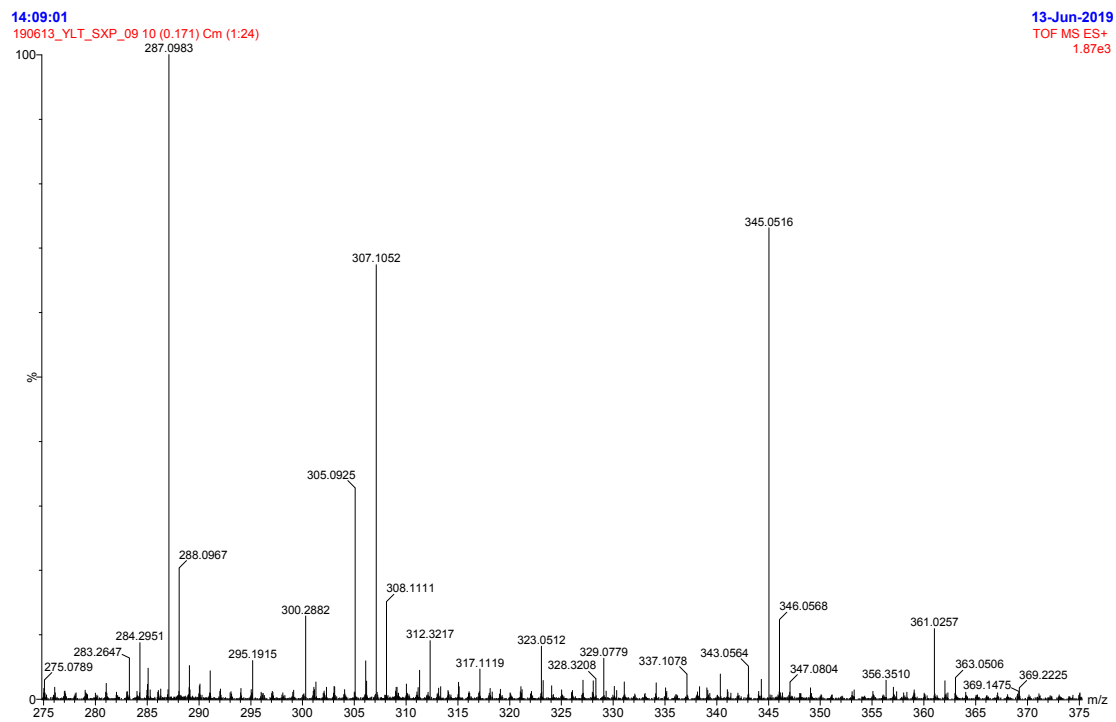

4b

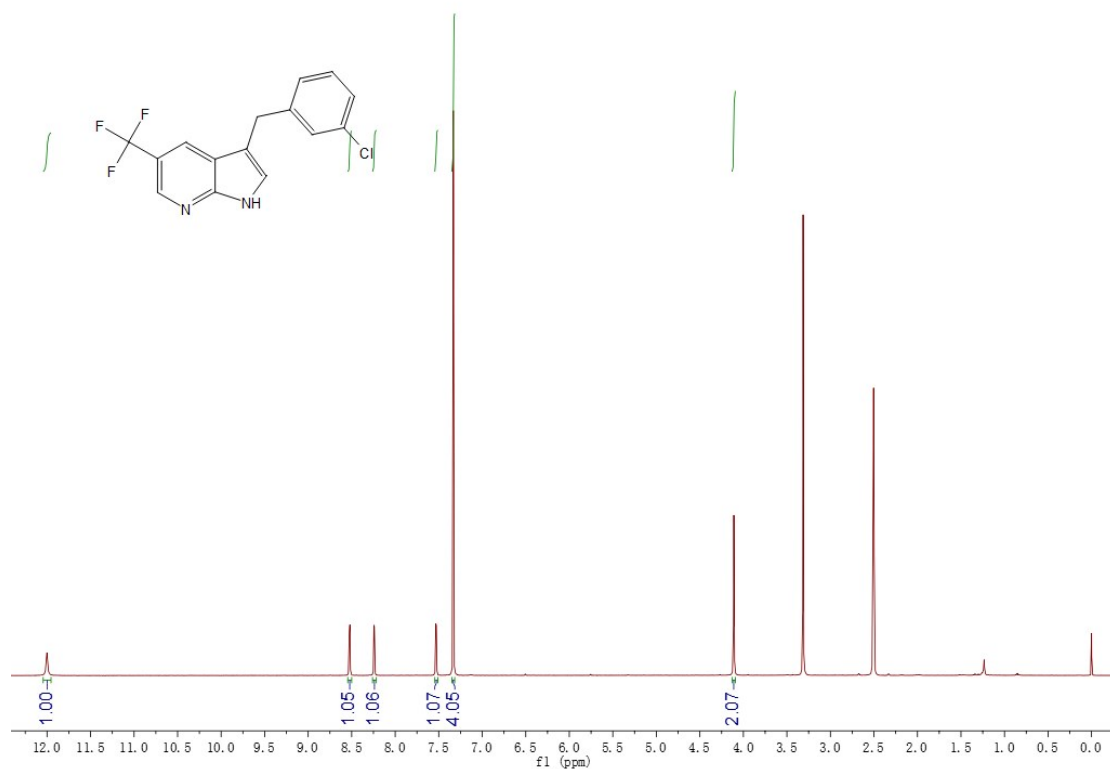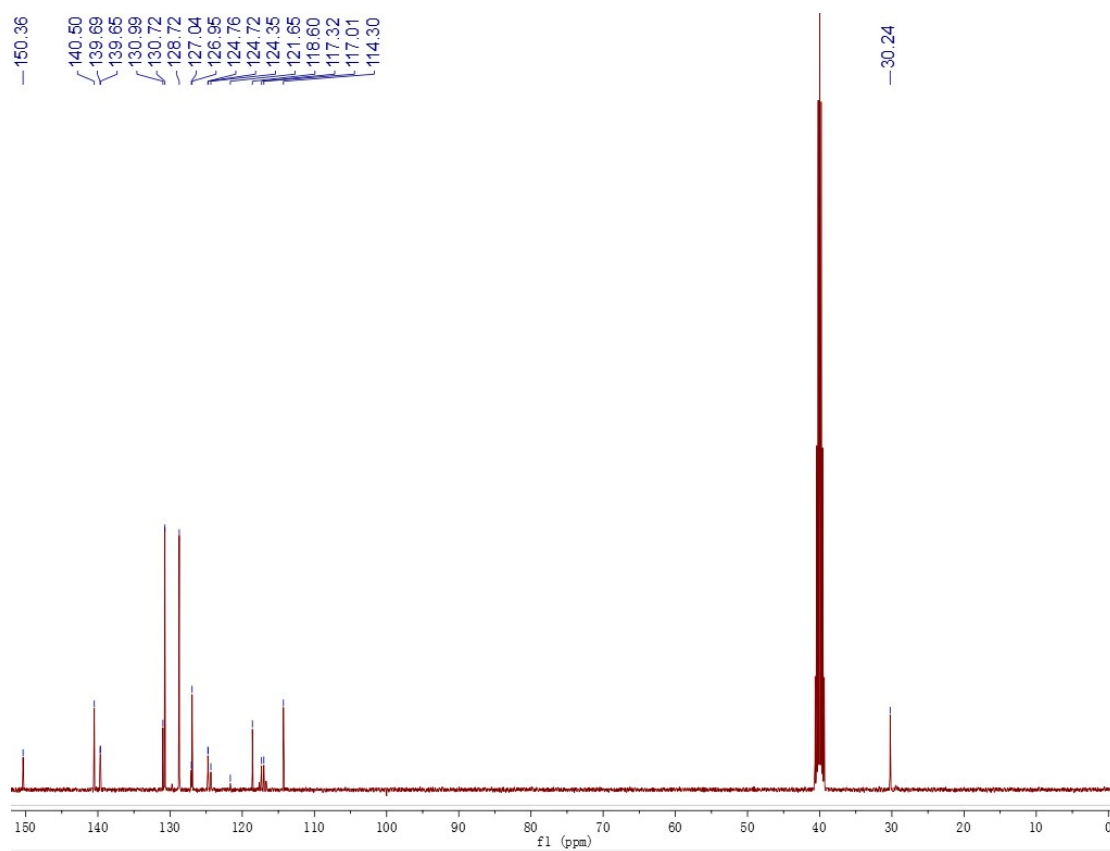

12:05:55  
190620\_YLT\_SXP\_S11 24 (0.411) Cm (1:24)

20-Jun-2019  
TOF MS ES+  
1.09e4

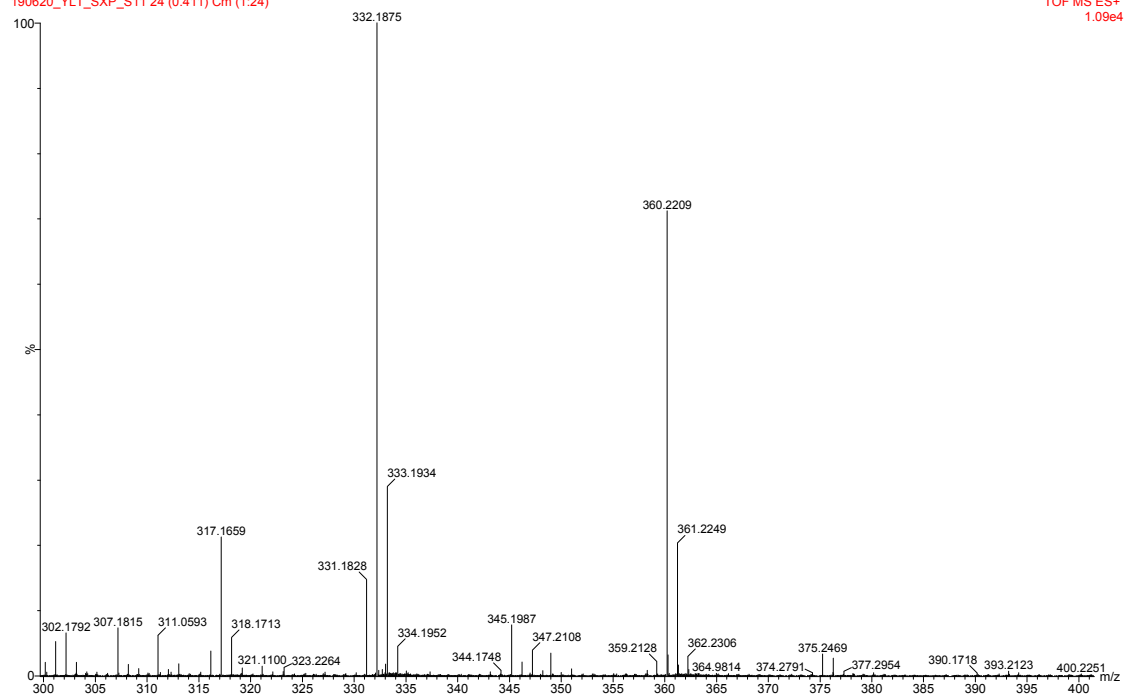

4c

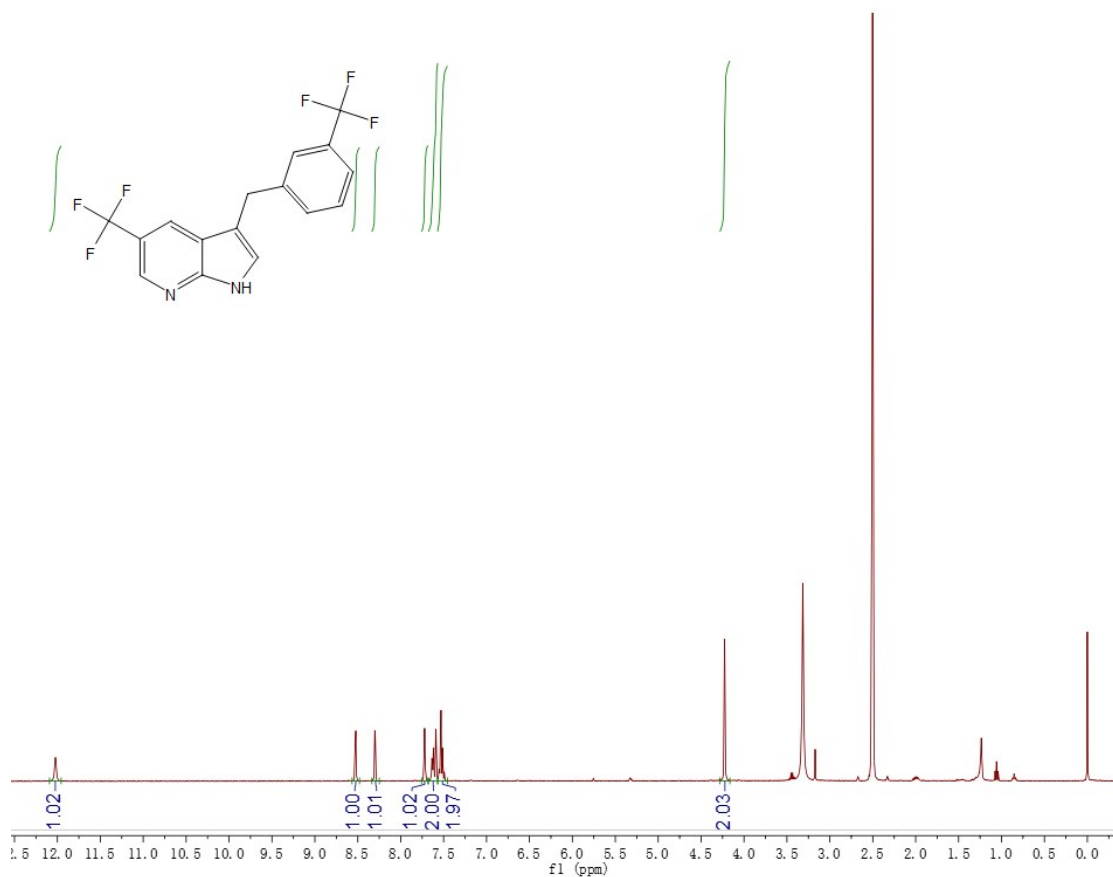

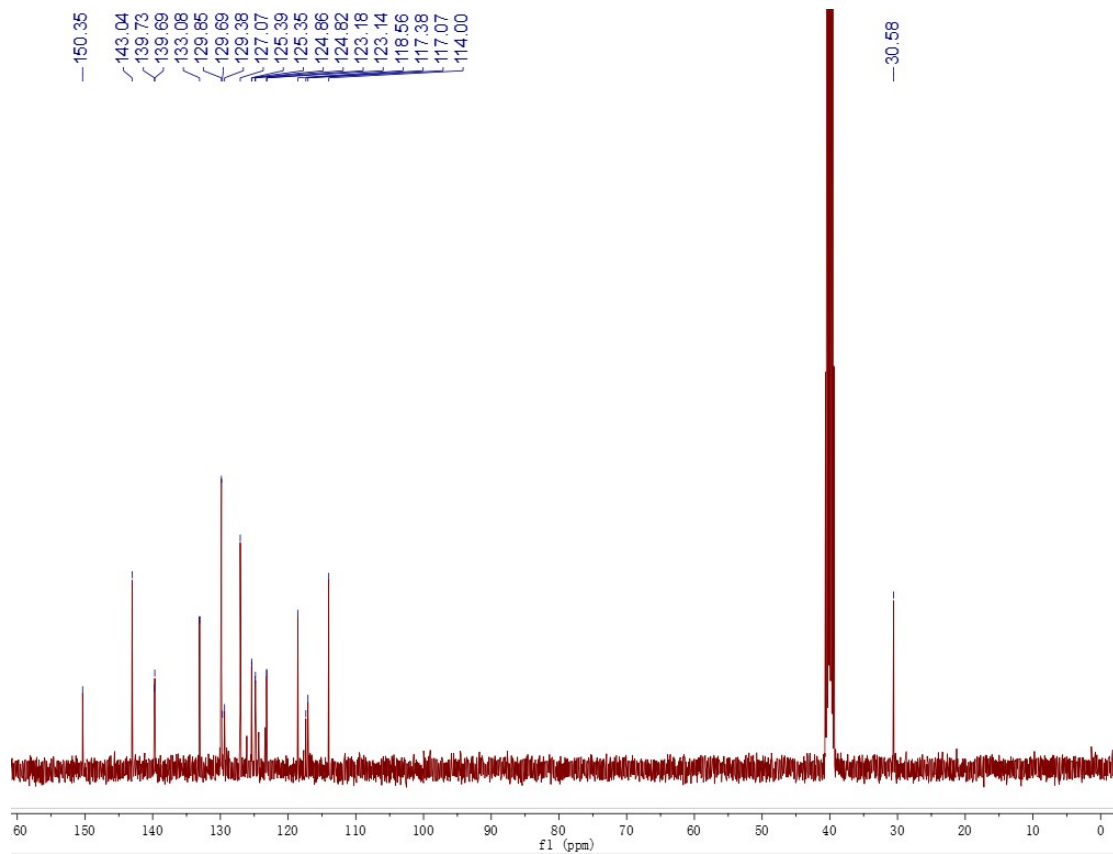

10:04:31  
190627\_YLT\_SXP\_S33 15 (0.257) Cm (3:24)

27-Jun-2019  
TOF MS ES+  
1.01e4

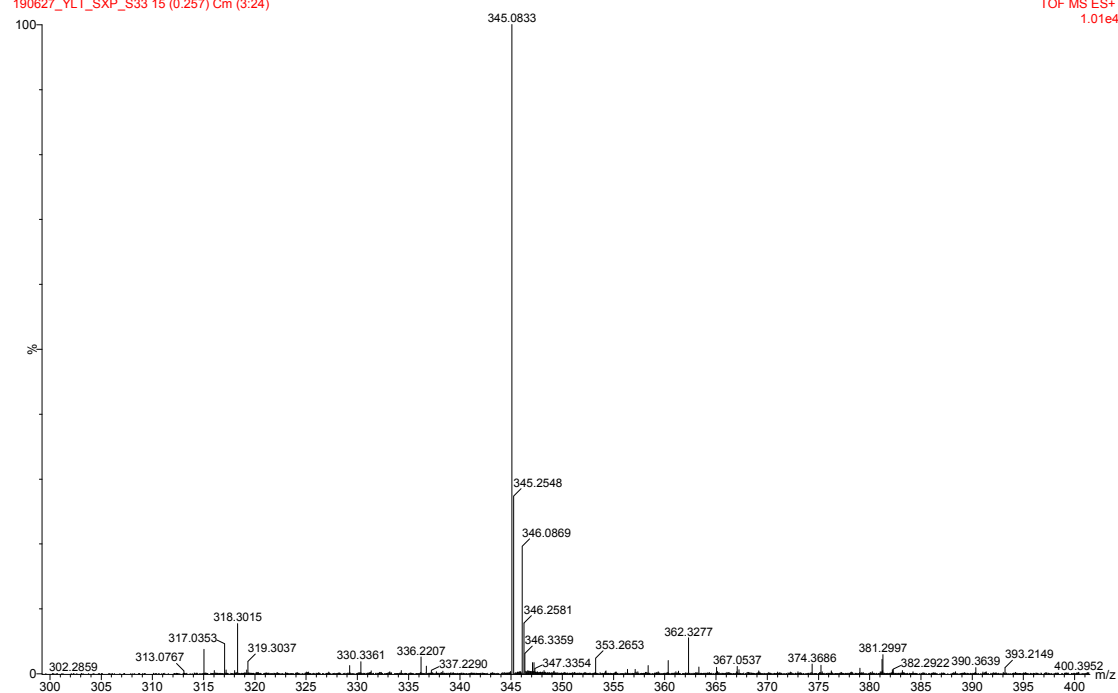

4d

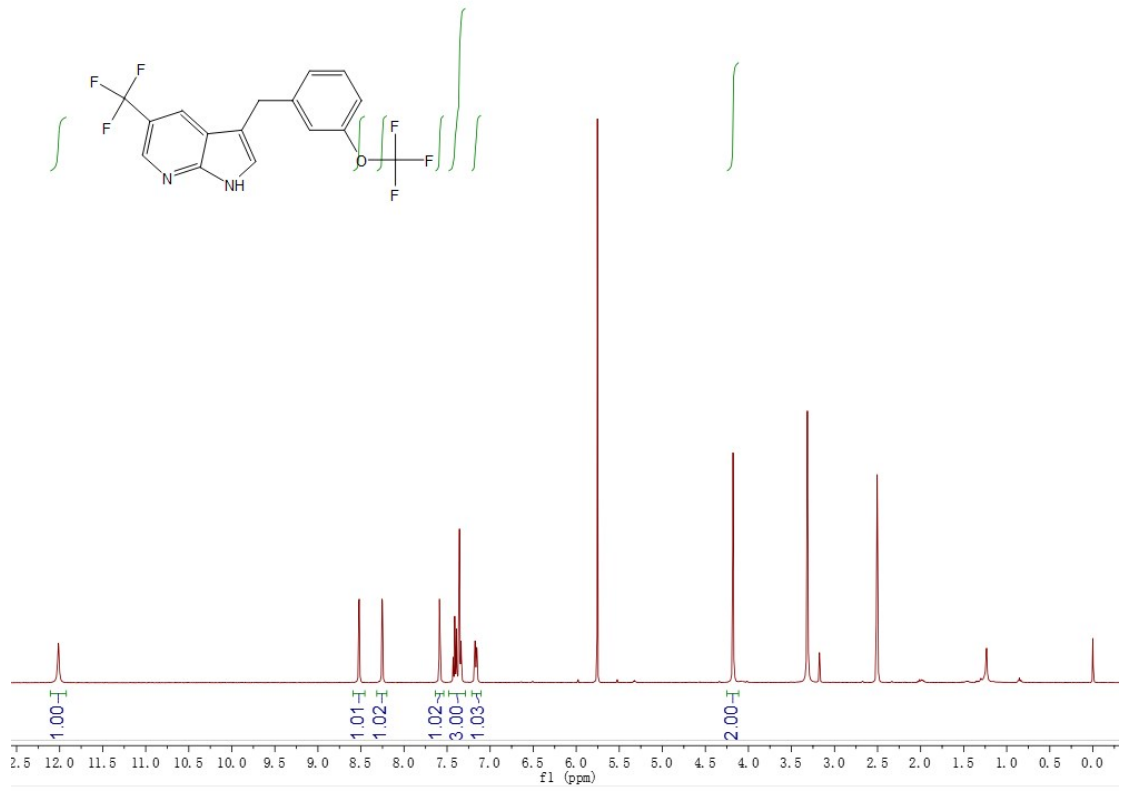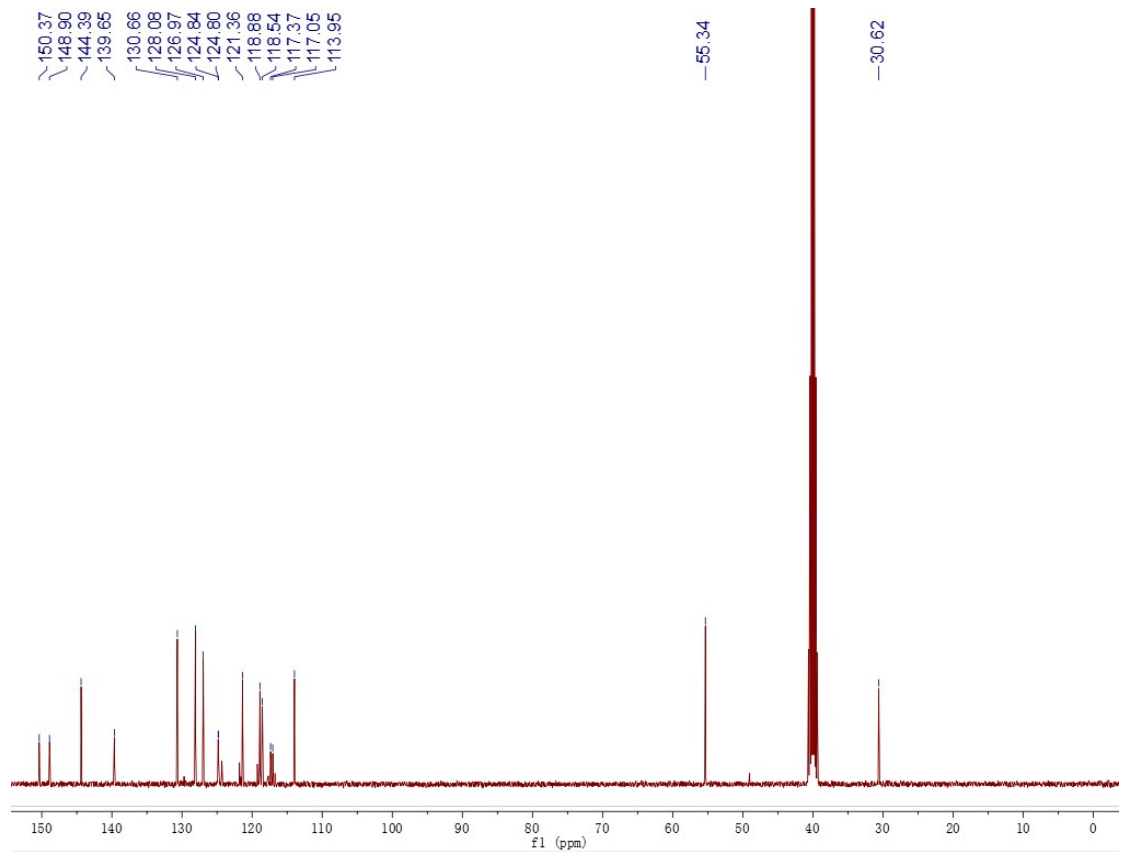

13:03:11  
190620\_YLT\_SXP\_S14 21 (0.359) Cm (1:24)

20-Jun-2019  
TOF MS ES+  
1.77e4

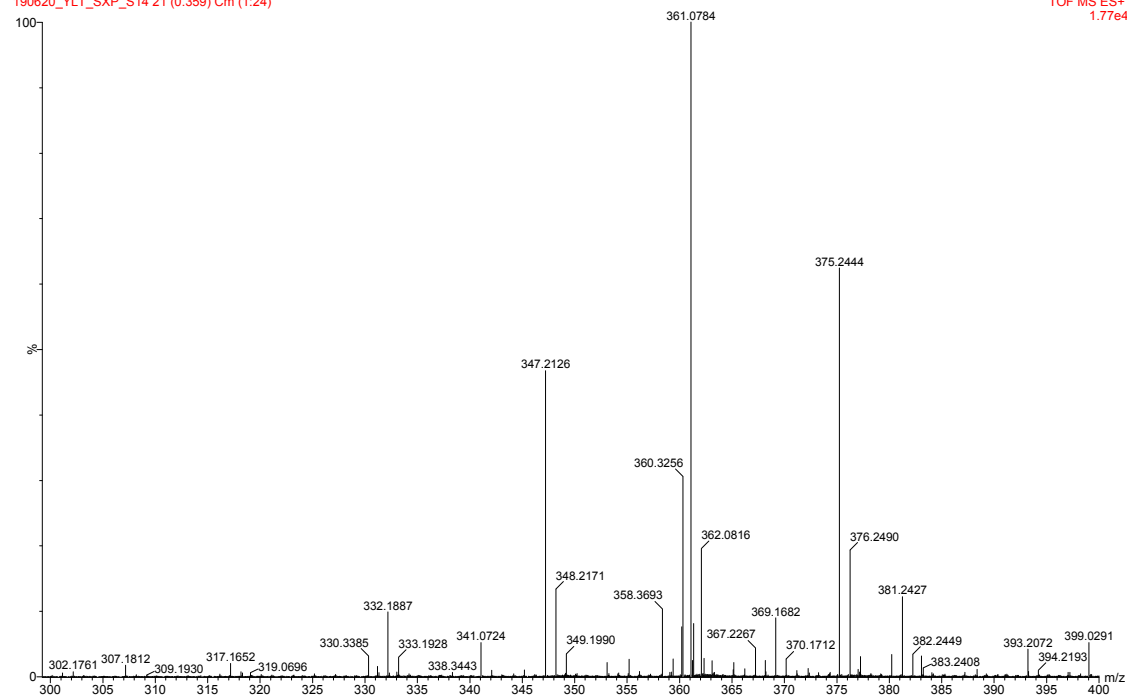

4e

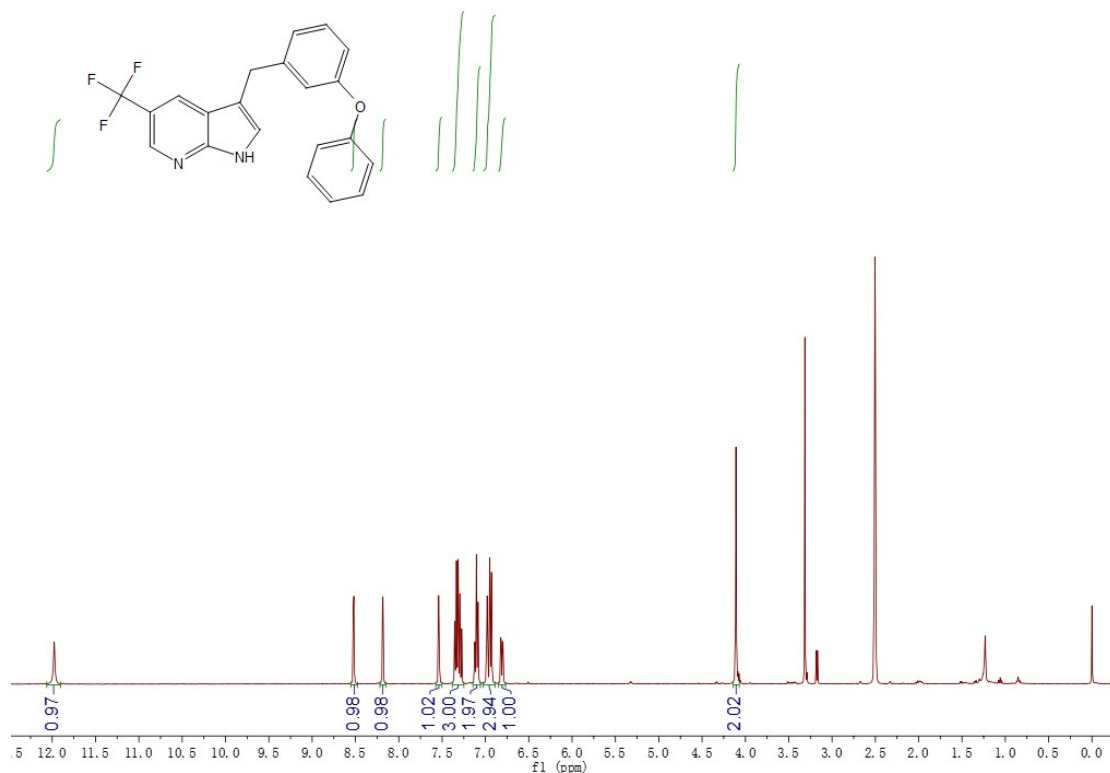

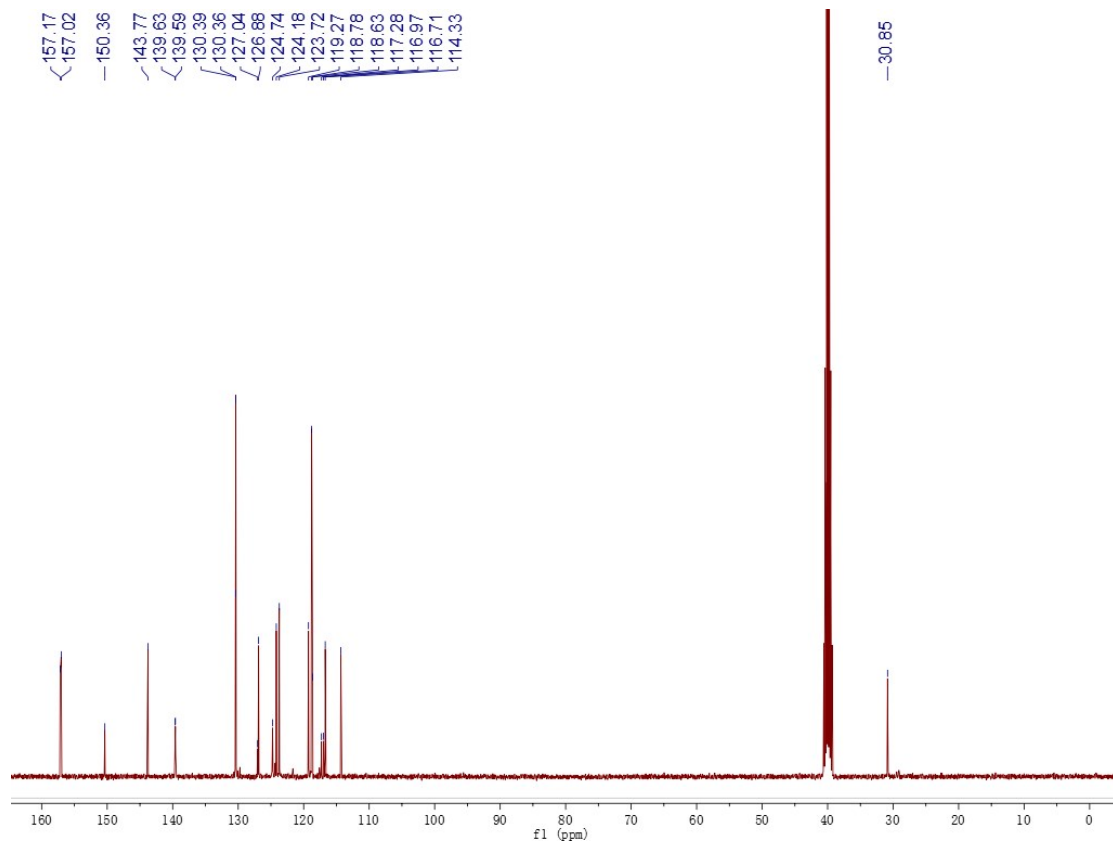

12:59:14  
190620\_YLT\_SXP\_S12 5 (0.086) Cm (2.24)

20-Jun-2019  
TOF MS ES+  
3.47e3

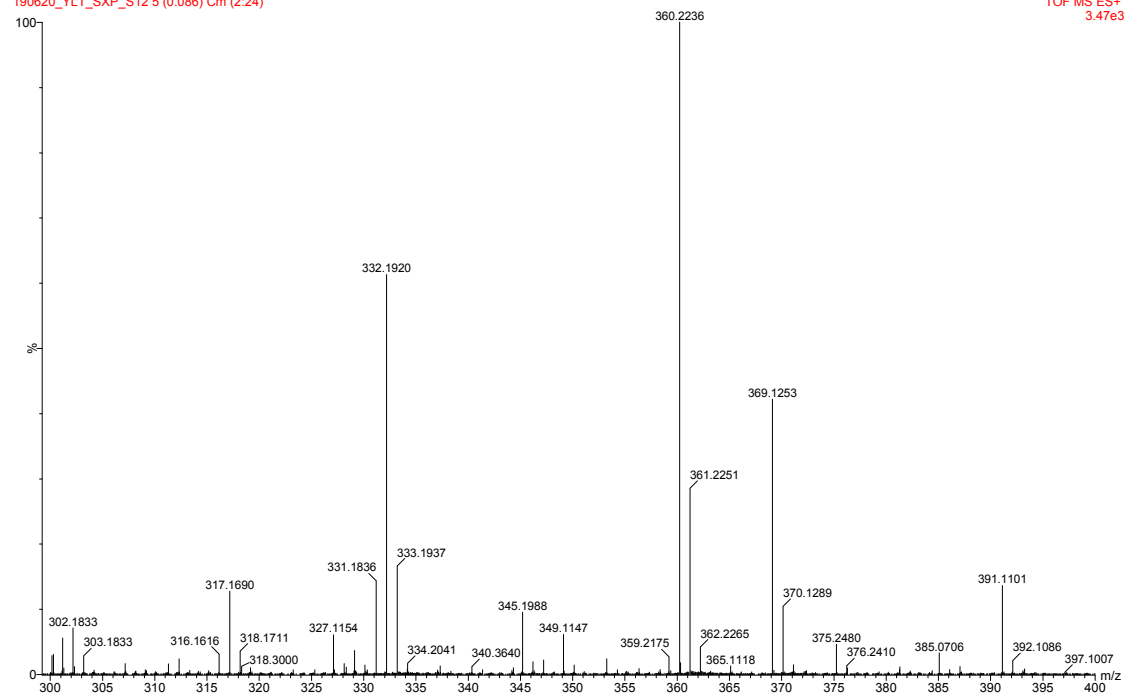

4f



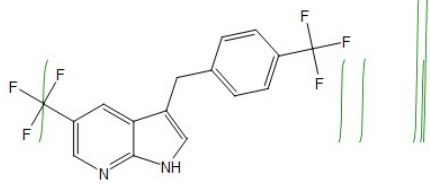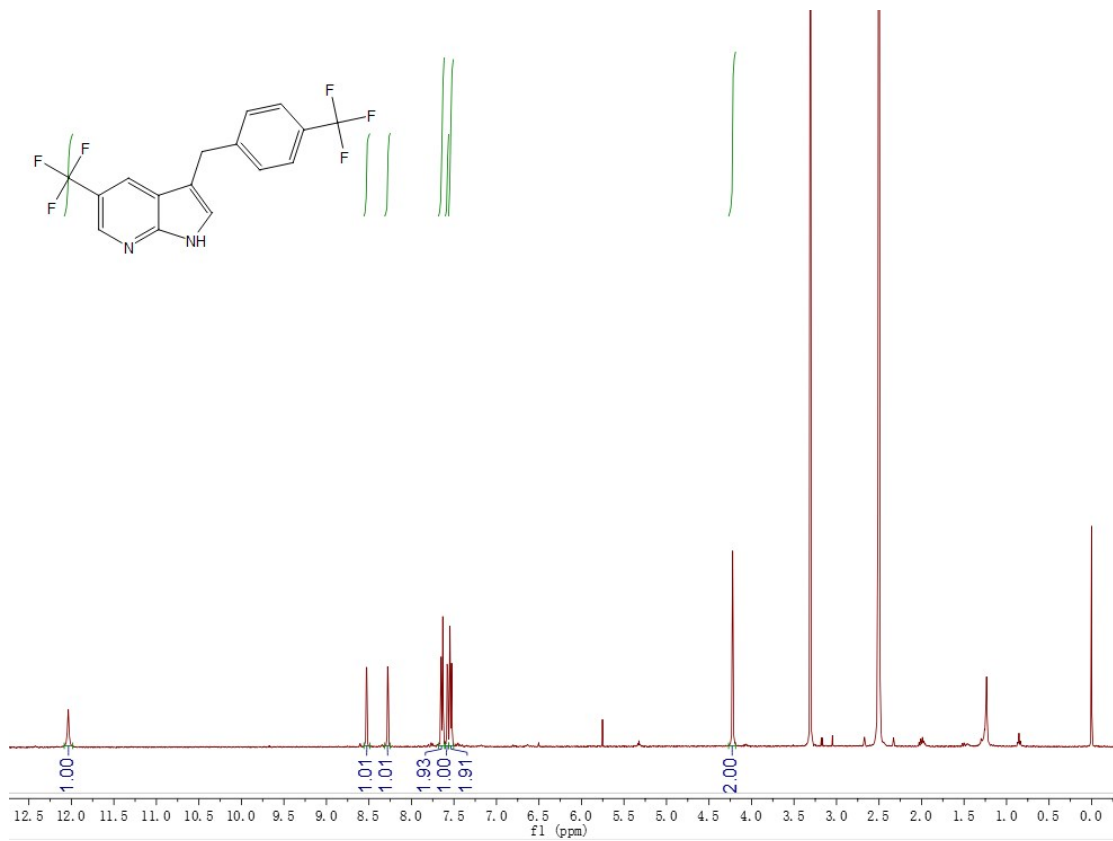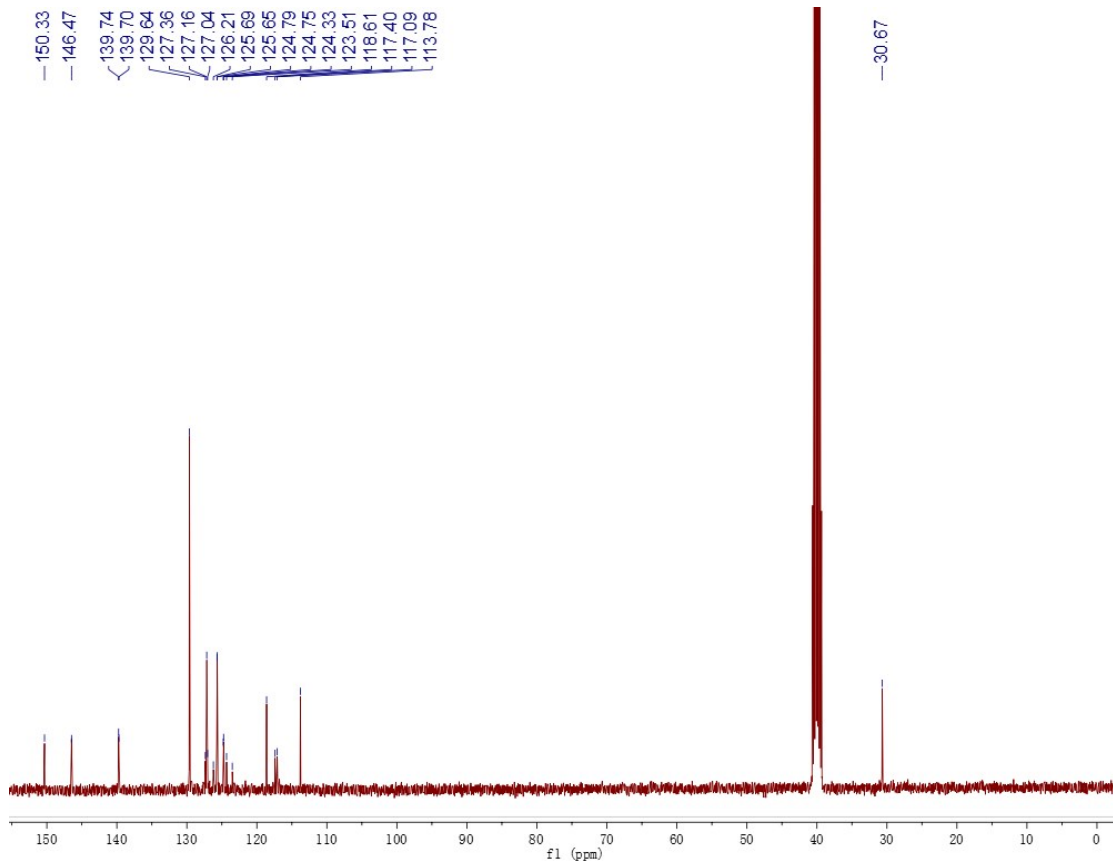

10:02:45  
190627\_YLT\_SXP\_S32 9 (0.154) Cm (4:24)

27-Jun-2019  
TOF MS ES+  
7.91e3

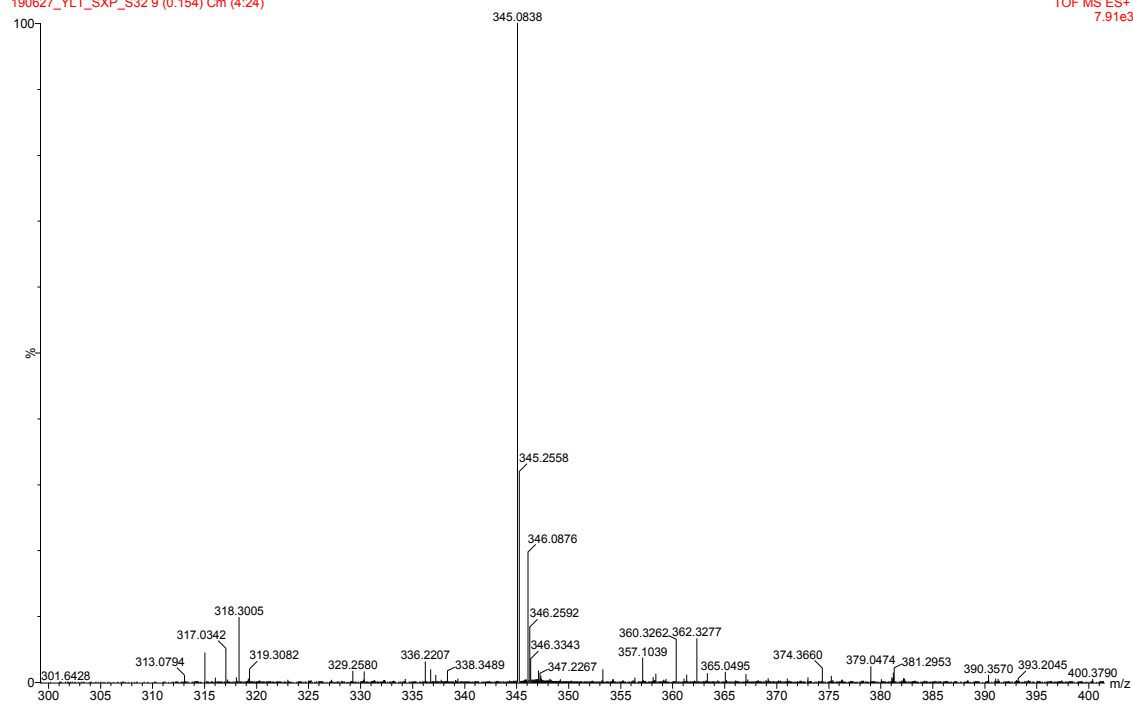

4g

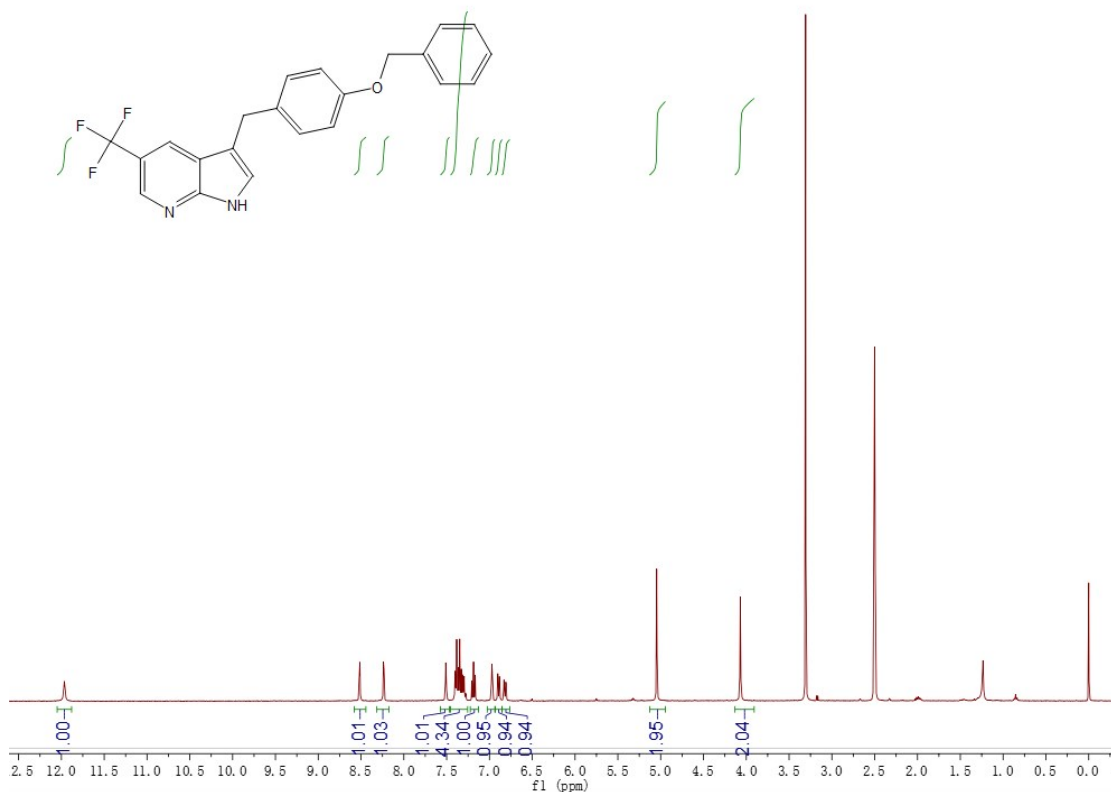

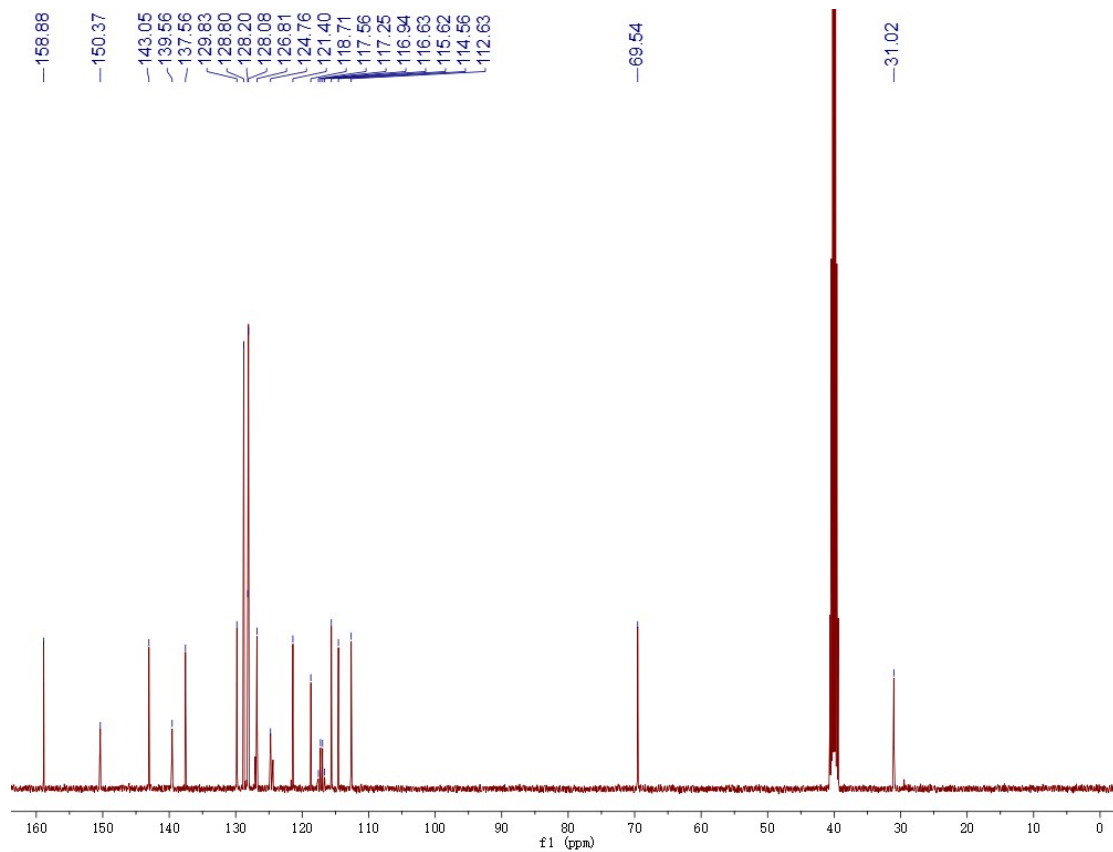

14:12:49  
190613\_YLT\_SXP\_10 17 (0.291) Cm (1.24)

13-Jun-2019  
TOF MS ES+  
6.23e3

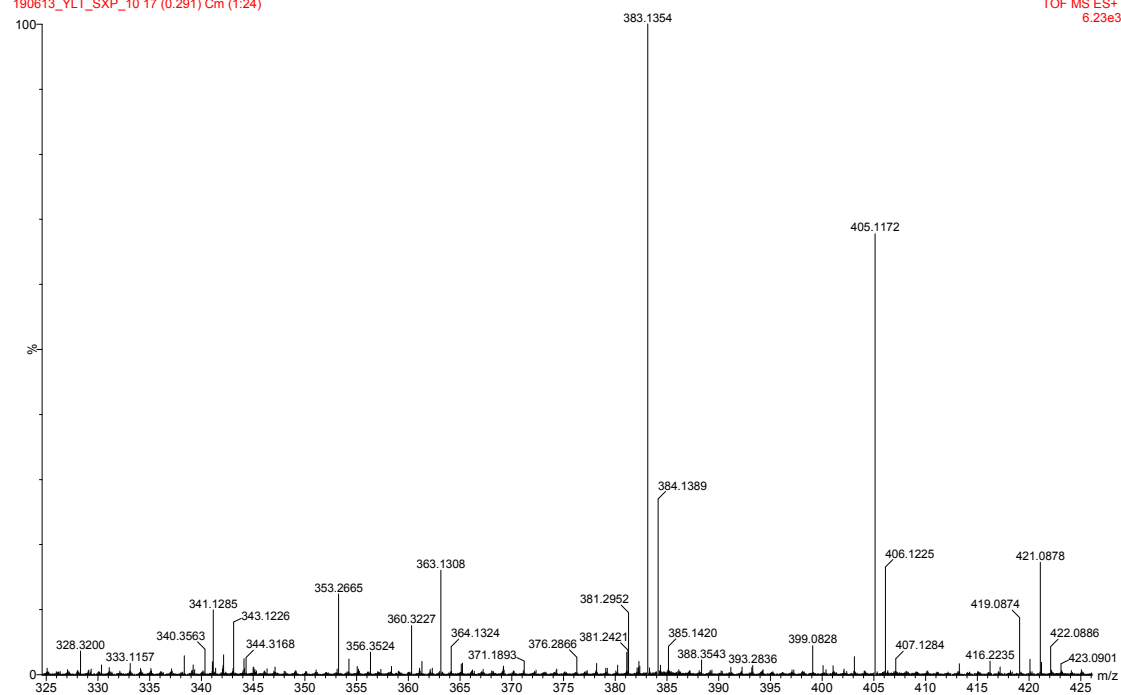

4h

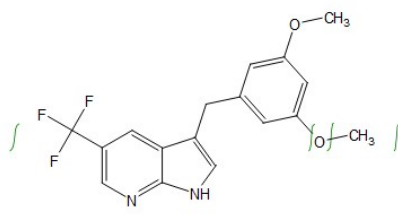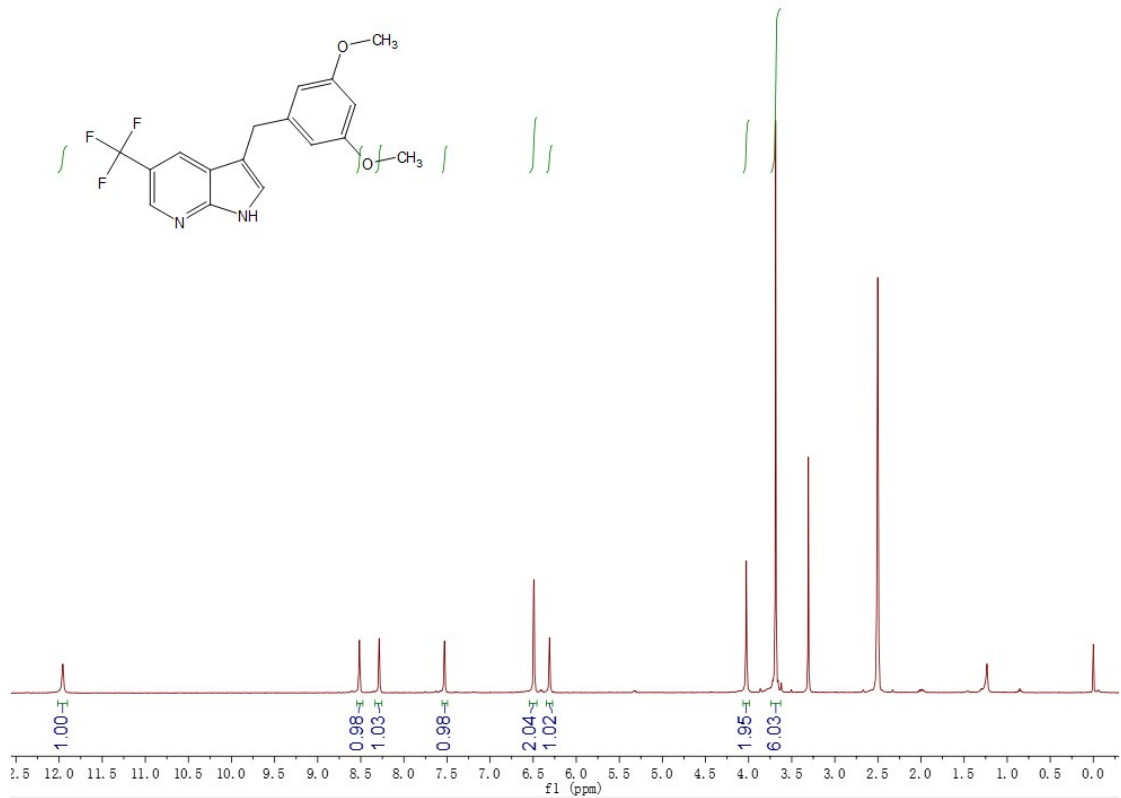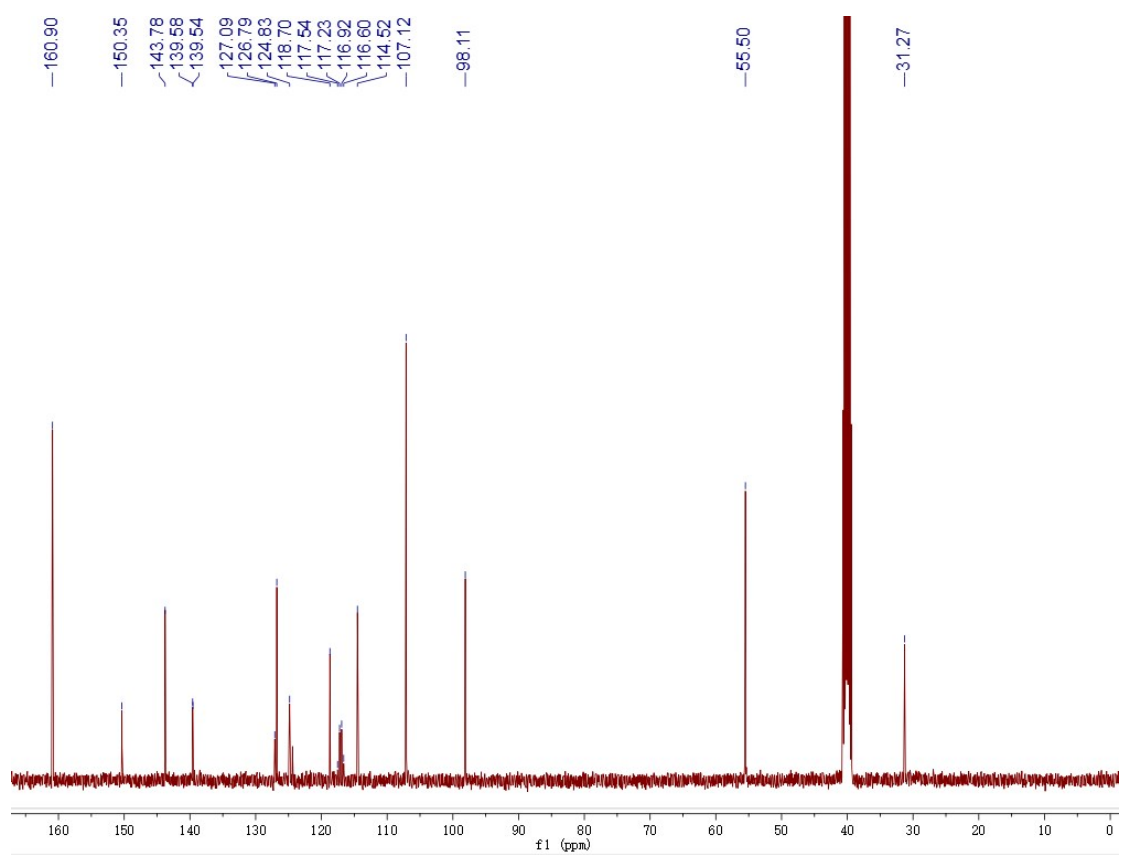

14:07:01  
190613\_YLT\_SXP\_08 15 (0.257) Cm (4:24)

13-Jun-2019  
TOF MS ES+  
3.20e4

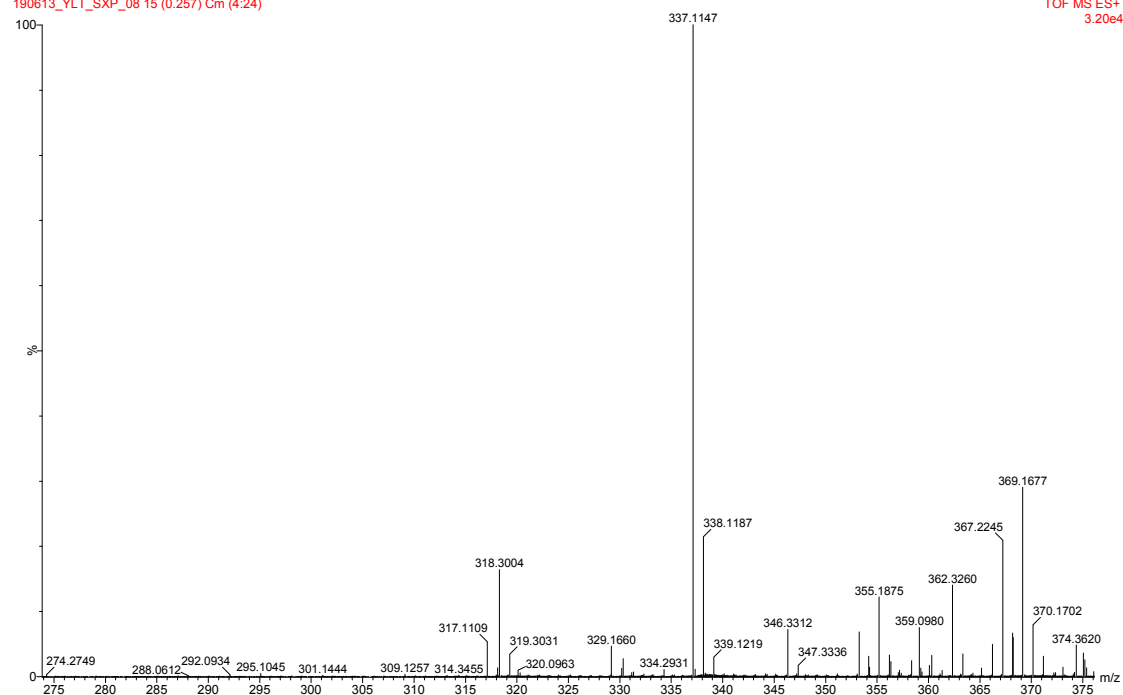

4i

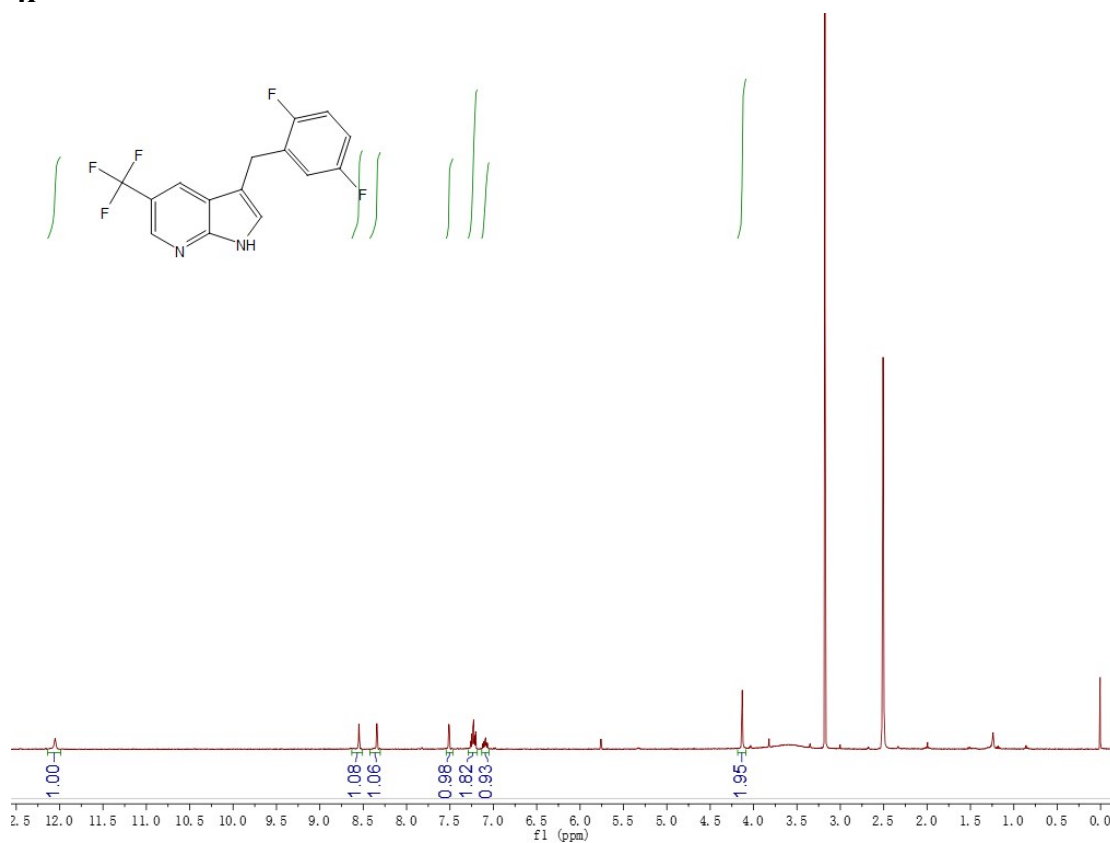

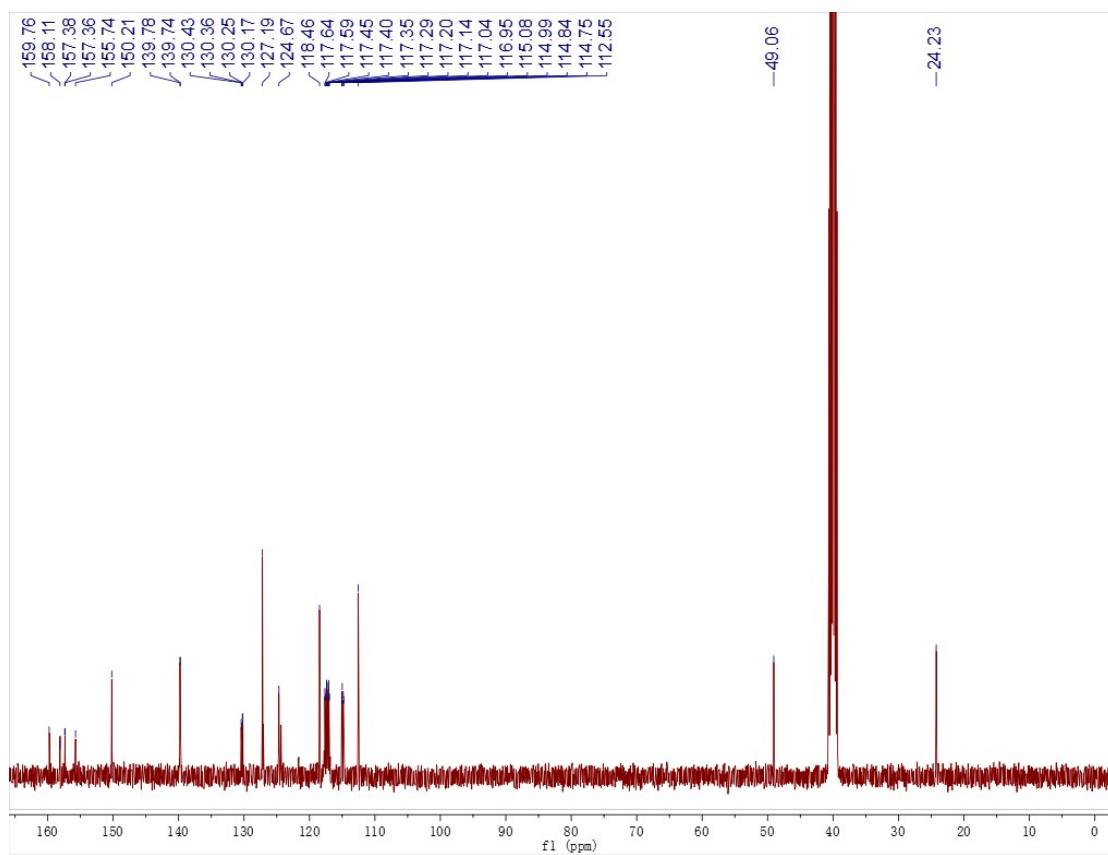

09:58:32  
190627\_YLT\_SXP\_S30 8 (0.137) Cm (2:24)

27-Jun-2019  
TOF MS ES+  
5.11e4

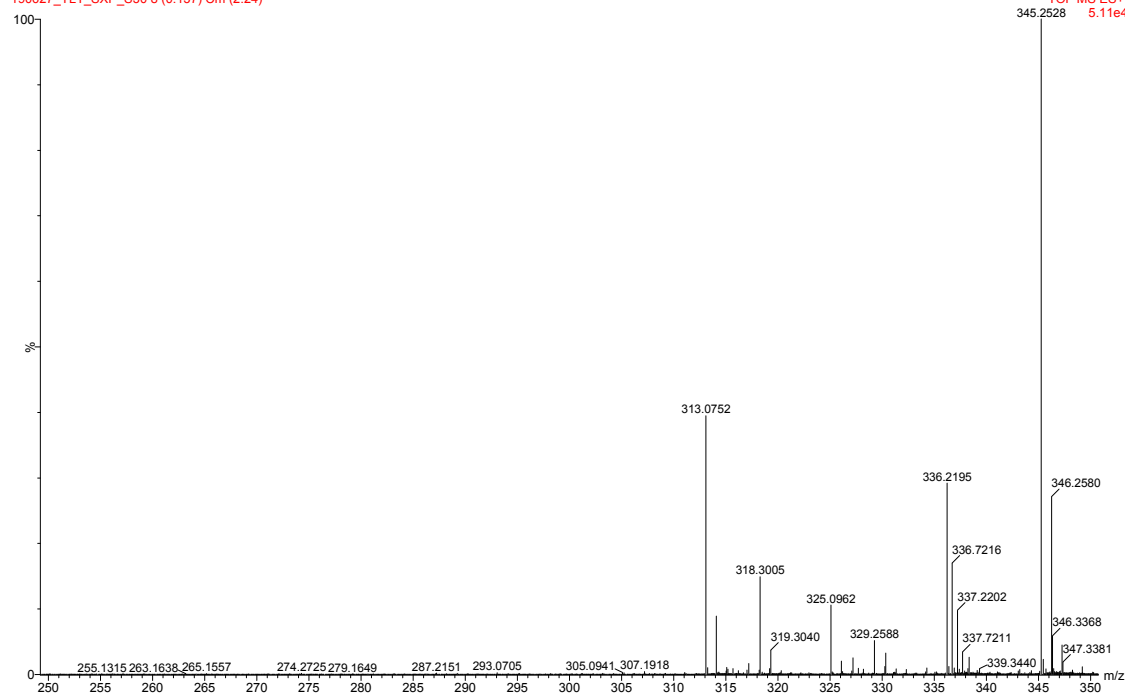

4j

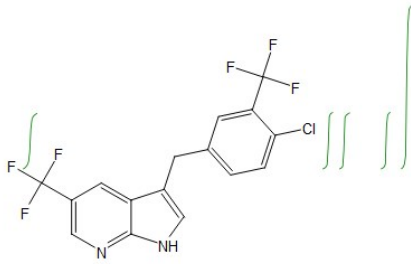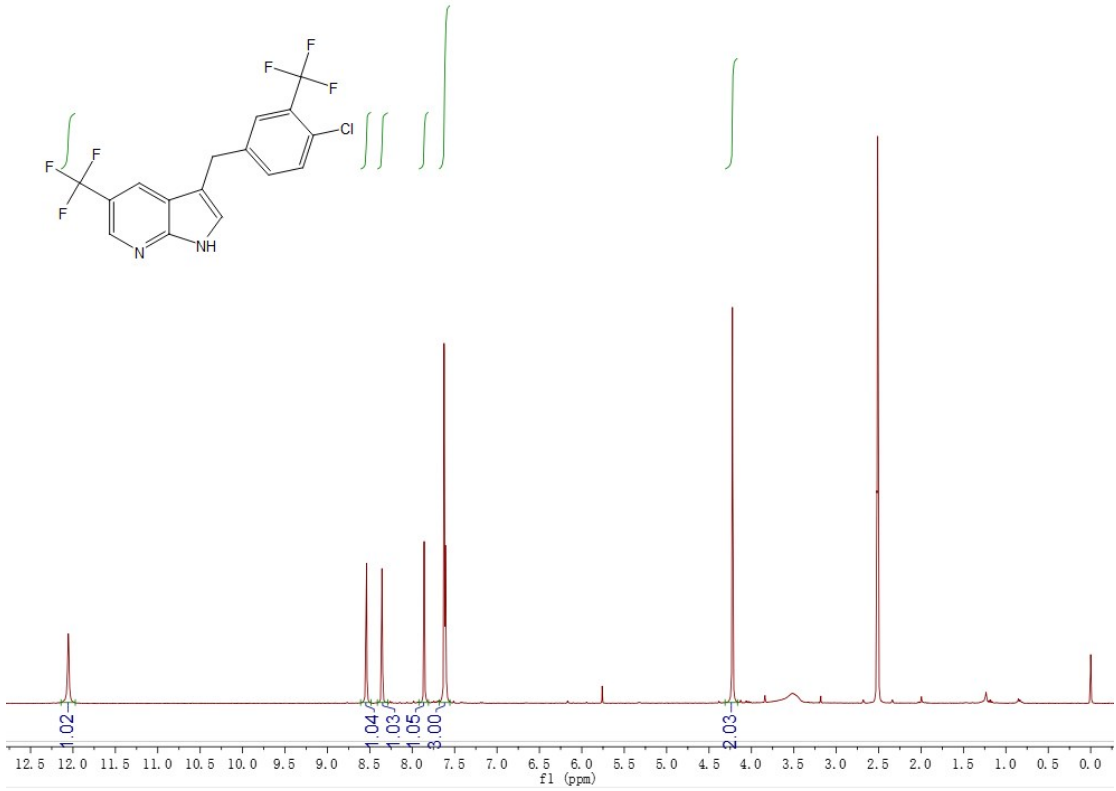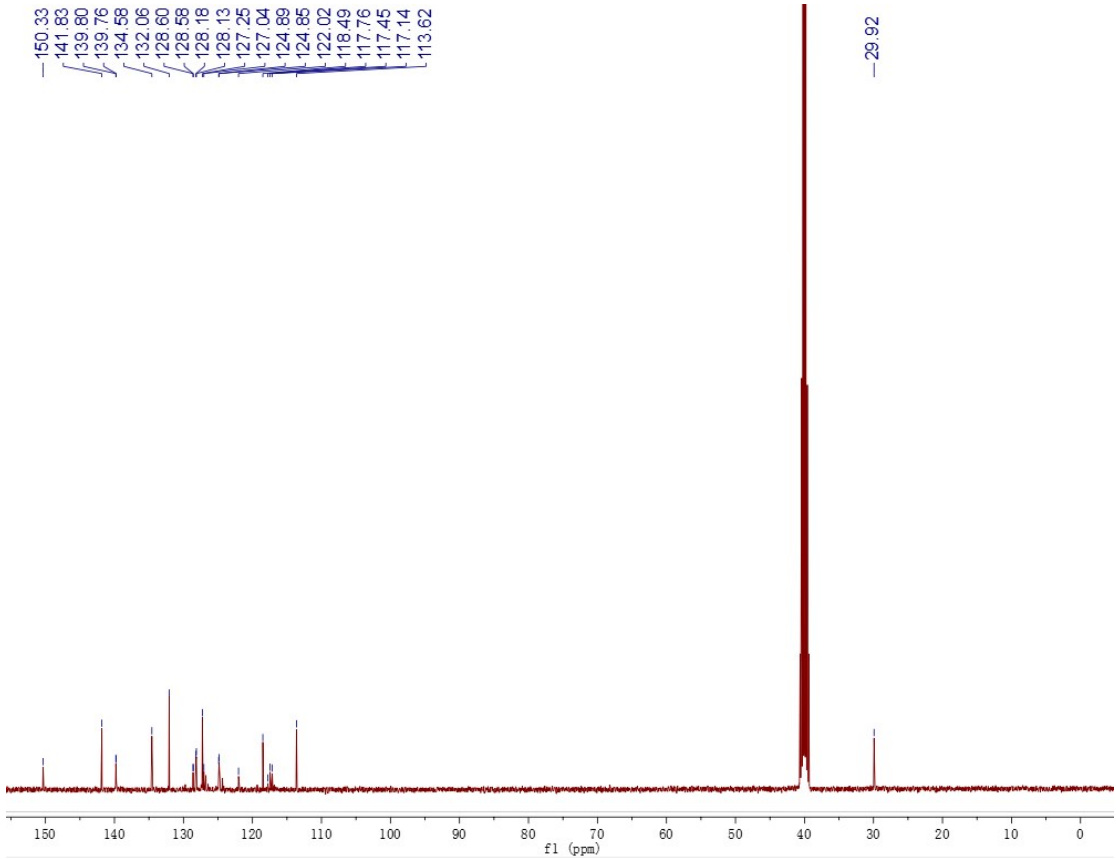

10:00:37  
190627\_YLT\_SXP\_S31 5 (0.086) Cm (3.24)

27-Jun-2019  
TOF MS ES+  
7.08e4

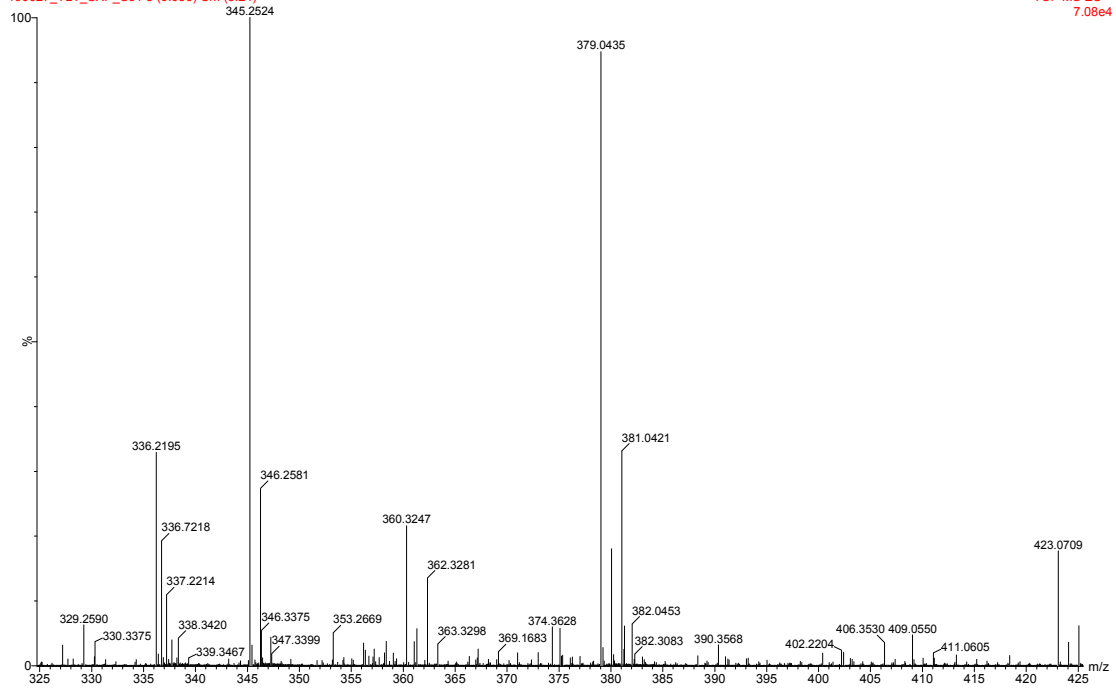

4k

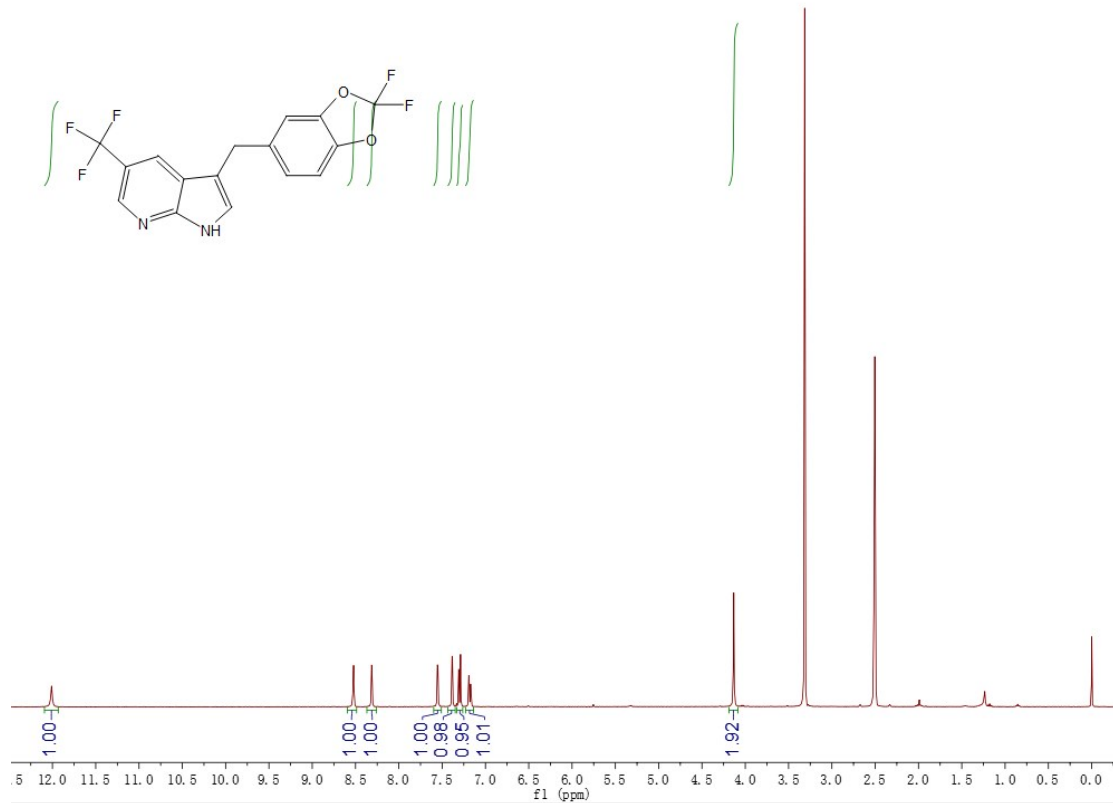



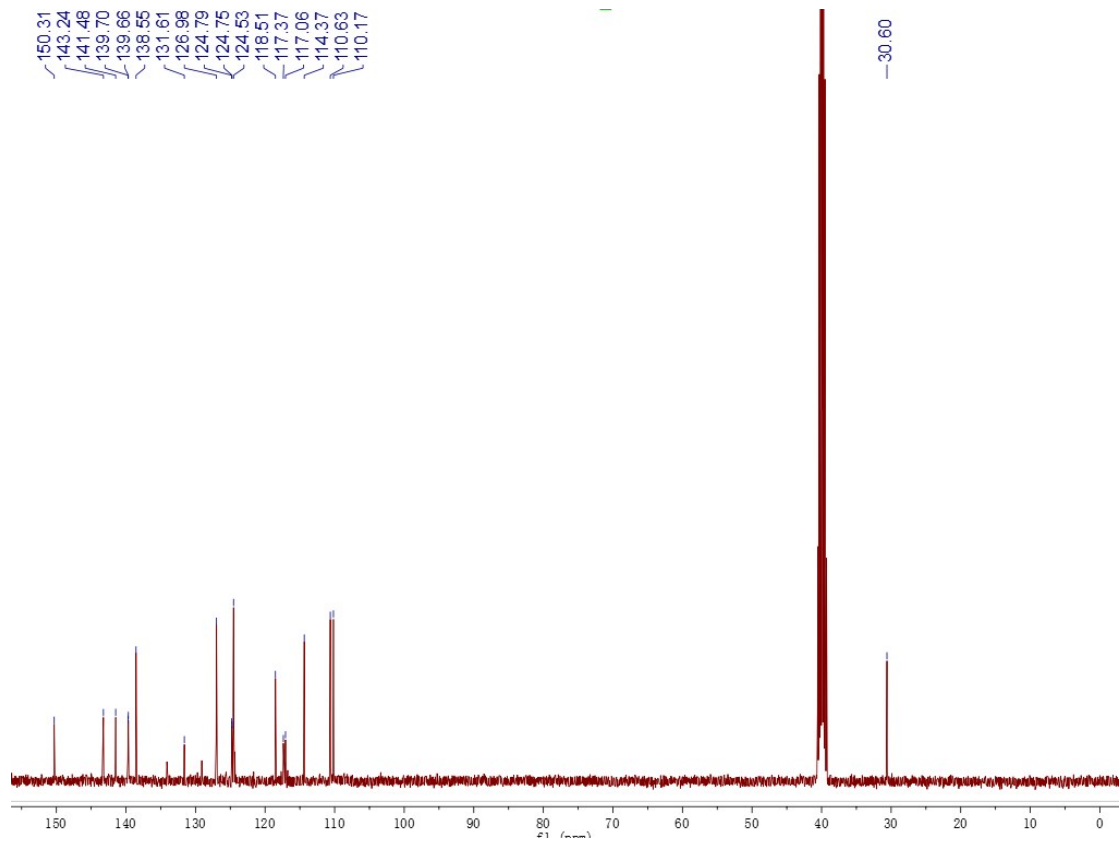

13:01:03  
190620\_YLT\_SXP\_S13 21 (0.359) Cm (1:24)

20-Jun-2019  
TOF MS ES+  
3.10e3

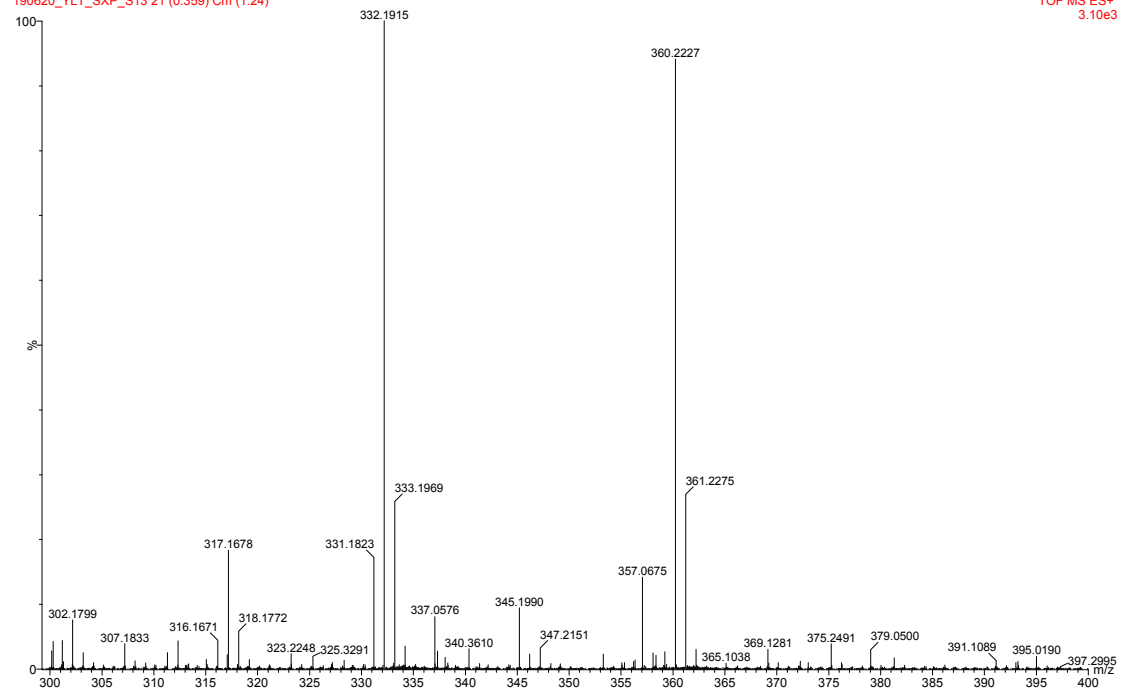

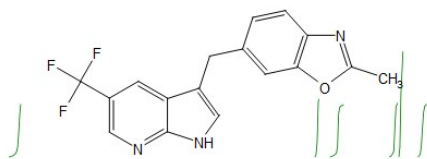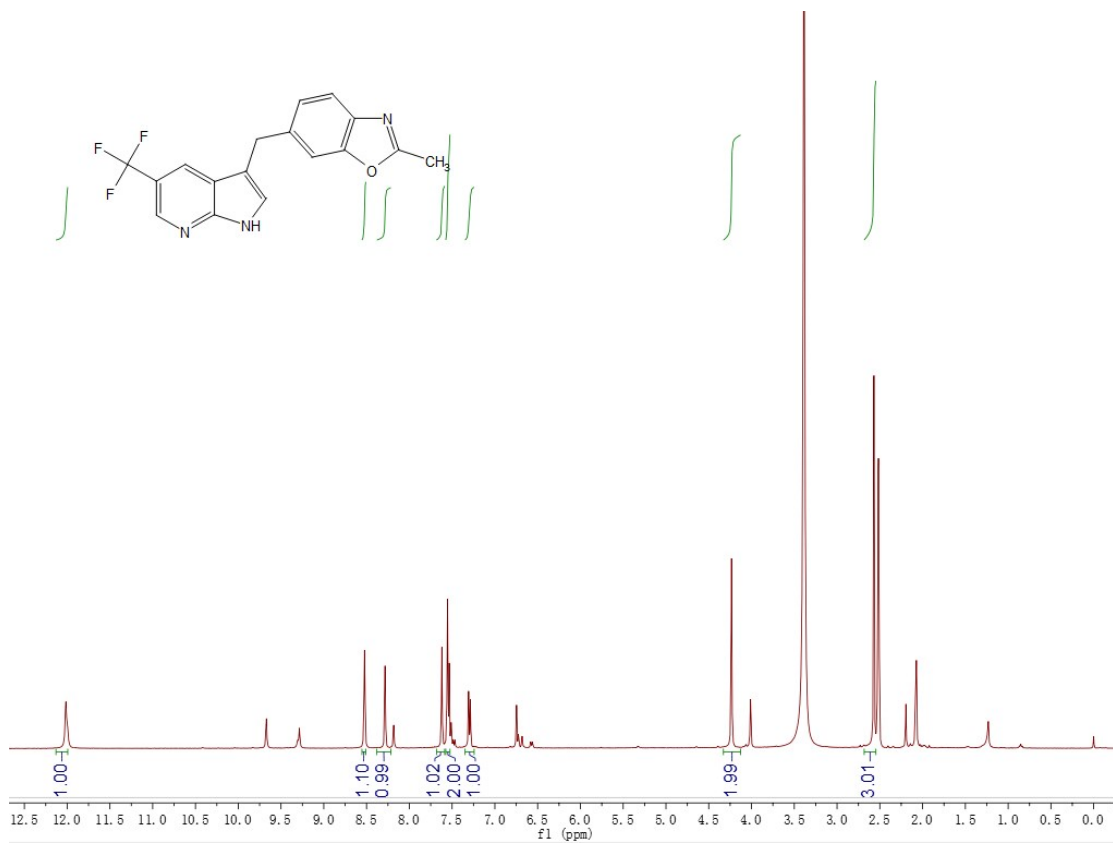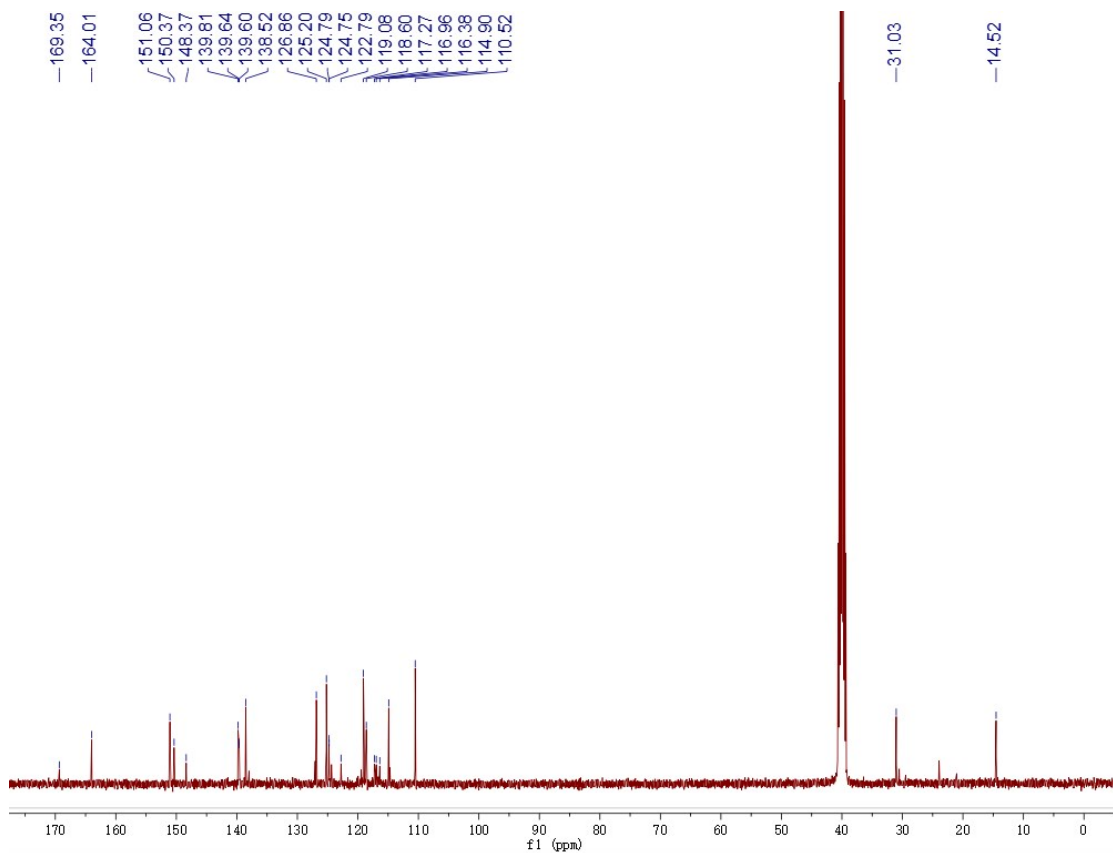

13:05:39

190620\_YLT\_SXP\_S19 22 (0.376) Cm (4:23)

20-Jun-2019

TOF MS ES+  
1.69e5

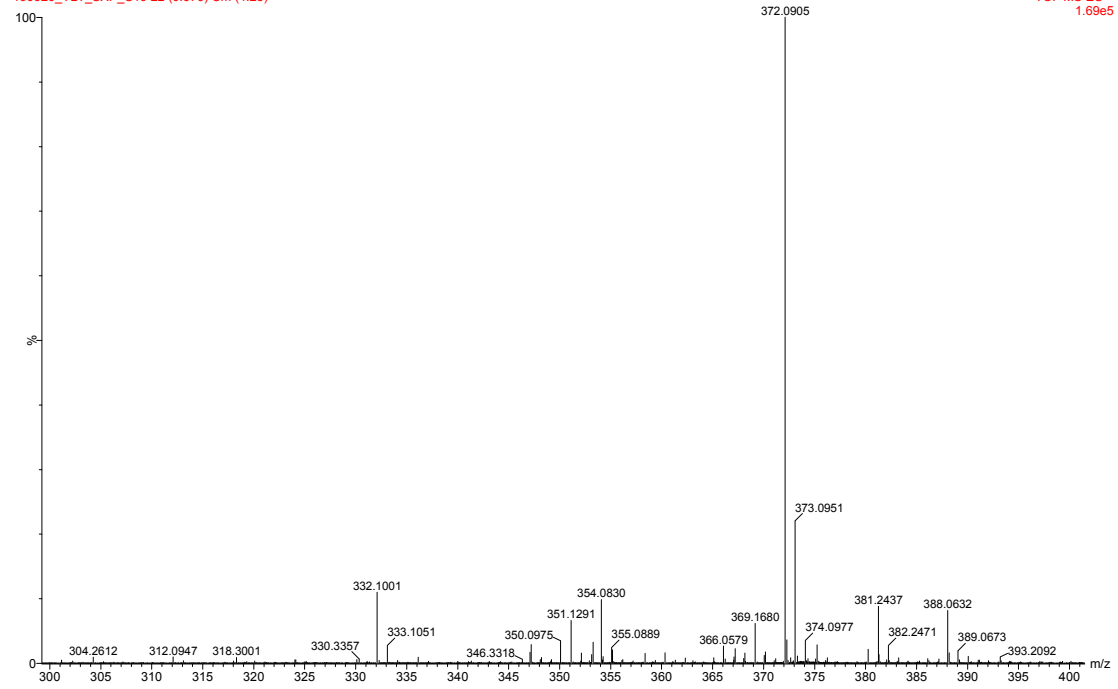

Supplement: d1ra02660g1.pdf [file d1ra02660g1.pdf]
